# Supplementary material for: U5 snRNP Core Proteins Are Key Components of the Defense Response against Viral Infection through Their Roles in Programmed Cell Death and Interferon Induction
Source: MDPI journal article supplement (doi:10.3390/v14122710), 2022-12-03
Supplement: s1 [file s1]

# **Supplementary Figures**

**U5 snRNP core proteins are key components of the defense response against viral infection through their roles in programmed cell death and interferon induction**

Simon Boudreault, Guy Lemay, Martin Bisailon

Table S1. qPCR primers

| Target   | Housekeeping gene | Species | Primer                             |                                 |
|----------|-------------------|---------|------------------------------------|---------------------------------|
|          |                   |         | Fw                                 | Rv                              |
| RIPK1    |                   | Mouse   | 5'-GCTTTGGCATTGTCCTTTGGGC-3'       | 5'-GGCTGATGATCTCCCTTGGACAG-3'   |
| RIPK3    |                   | Mouse   | 5'-TACACAGCTTGAACCCTCCGCT-3'       | 5'-ACCCTCCCTGAAACGTGGACAG-3'    |
| MLKL     |                   | Mouse   | 5'-TGTCAGCCAGCCAGCATCCT-3'         | 5'-GGGTTTTGTTGATTTCTTCCACGCT-3' |
| DDX60    |                   | Mouse   | 5'-CCACCACAGTTCCATGAGTGCC-3'       | 5'-TGATTCCCAAAGCGAGTGTTCCA-3'   |
| IFNB1    |                   | Mouse   | 5'-ACACTGCCTTTGCCATCCAAGA-3'       | 5'-ACACTGTCTGCTGGTGGAGTTCA-3'   |
| MX1      |                   | Mouse   | 5'-GAAGGAGAGGAGTGGAGAGGCA-3'       | 5'-GCTTATCACTGATCCCCAGGCC-3'    |
| MX2      |                   | Mouse   | 5'-GGAAGCTGAGGAGGAGAAGAAGACA-3'    | 5'-GCTGGAGATGCGGTTGTGAGC-3'     |
| DDX58    |                   | Mouse   | 5'-AACTTGCTTTGGAGAAAGACAACAGC-3'   | 5'-CGCCTCCGCTCCATCATCCT-3'      |
| EFTUD2   |                   | Mouse   | 5'-TCGGCTCAGTGAAGGACAGCAT-3'       | 5'-GGGCAACCACAGCATCCAGT-3'      |
| PRPF8    |                   | Mouse   | 5'-CCACCAGCCTTTGAGAGACAGTAG-3'     | 5'-GGCCAGTCGGTAGAGTGTGGAC-3'    |
| SNRNP200 |                   | Mouse   | 5'-AACTGGAGCGAGAGGAGGAAGT-3'       | 5'-TGAGGCTGTTGGACTTGGCGT-3'     |
| PSMC4    | ✓                 | Mouse   | 5'-CCCAGGAGGAGGTGAAGCGG-3'         | 5'-GGTCGATGGTACTCAGGATGCG-3'    |
| PUM1     | ✓                 | Mouse   | 5'-TGCCAGTCTCTTCCAGCAGCA-3'        | 5'-TGATTTGGGGTCAAAGGACGTTGG-3'  |
| TXNL4B   | ✓                 | Mouse   | 5'-CCCTCTACCGTATTTTTCTTCAATGGGC-3' | 5'-AGTTTTCCCCTCATCGCTCCCC-3'    |

Table S2. AS-PCR primers

| Gene  | Primers                       |                               | ASE present in this region                           | Expected peak(s) (bp) | Detected peak(s) (bp) | ASE quantified | Corresponding detected peak(s) (bp) |
|-------|-------------------------------|-------------------------------|------------------------------------------------------|-----------------------|-----------------------|----------------|-------------------------------------|
|       | Fw                            | Rv                            |                                                      |                       |                       |                |                                     |
| MLKL  | 5'-CAGGATTGCCCTGAGTTGTTGC-3'  | 5'-CCTCTTACACCTTCTTGTCCGT-3'  | 5'-SS                                                | 136, 160              | 136, 160, 261, 269    | 5'-SS          | 136, 160                            |
| RIPK1 | 5'-GGA ACTATTCGCTGGTGATGGA-3' | 5'-TGTCATTCAGGTGTTCCGGGTGC-3' | Exon cassette                                        | 210, 348              | 348, 471              | Exon cassette  | 348                                 |
| RIPK1 | 5'-GCCCCGTCCTTCCTCACCTAG-3'   | 5'-AACACAAGGACACCTTCCCGA-3'   | Possible exon cassette of the alternative first exon | 212, 292              | 212                   | Exon cassette  | 212                                 |
| RIPK3 | 5'-CTCCCGACGATGTCTTCTGTCA-3'  | 5'-ACTCCGAACCCTCCTTTACCCA-3'  | 3'-SS                                                | 96, 113, 194          | 113, 382              | 3'-SS          | 113                                 |
| RIPK3 | 5'-TTGAACCCTCCGCTCCTGCA-3'    | 5'-CAGCCAGCACTGCCACACG-3'     | Exon cassette                                        | 104, 262              | 262                   | Exon cassette  | 262                                 |

Figure S1. qPCR validation of the knock-down of EFTUD2, PRPF8, SNRNP200 and RIG-I (DDX58). L929 were transfected with the appropriate siRNA for 72 h before RNA was harvested, reverse transcribed and subjected to qPCR. *PSMC4*, *PUM1*, and *TXNL4B* were used as housekeeping genes for normalization. n=3, biological replicates, one-way ANOVA with Dunnett's multiple comparisons test against the control siRNA condition for EFTUD2, PRPF8, and SNRNP200; unpaired two-tailed Student's t-test for RIG-I (ns,  $P > 0.05$ ; \*\*,  $P \leq 0.01$ ; \*\*\*,  $P \leq 0.001$ ; \*\*\*\*,  $P \leq 0.0001$ ).

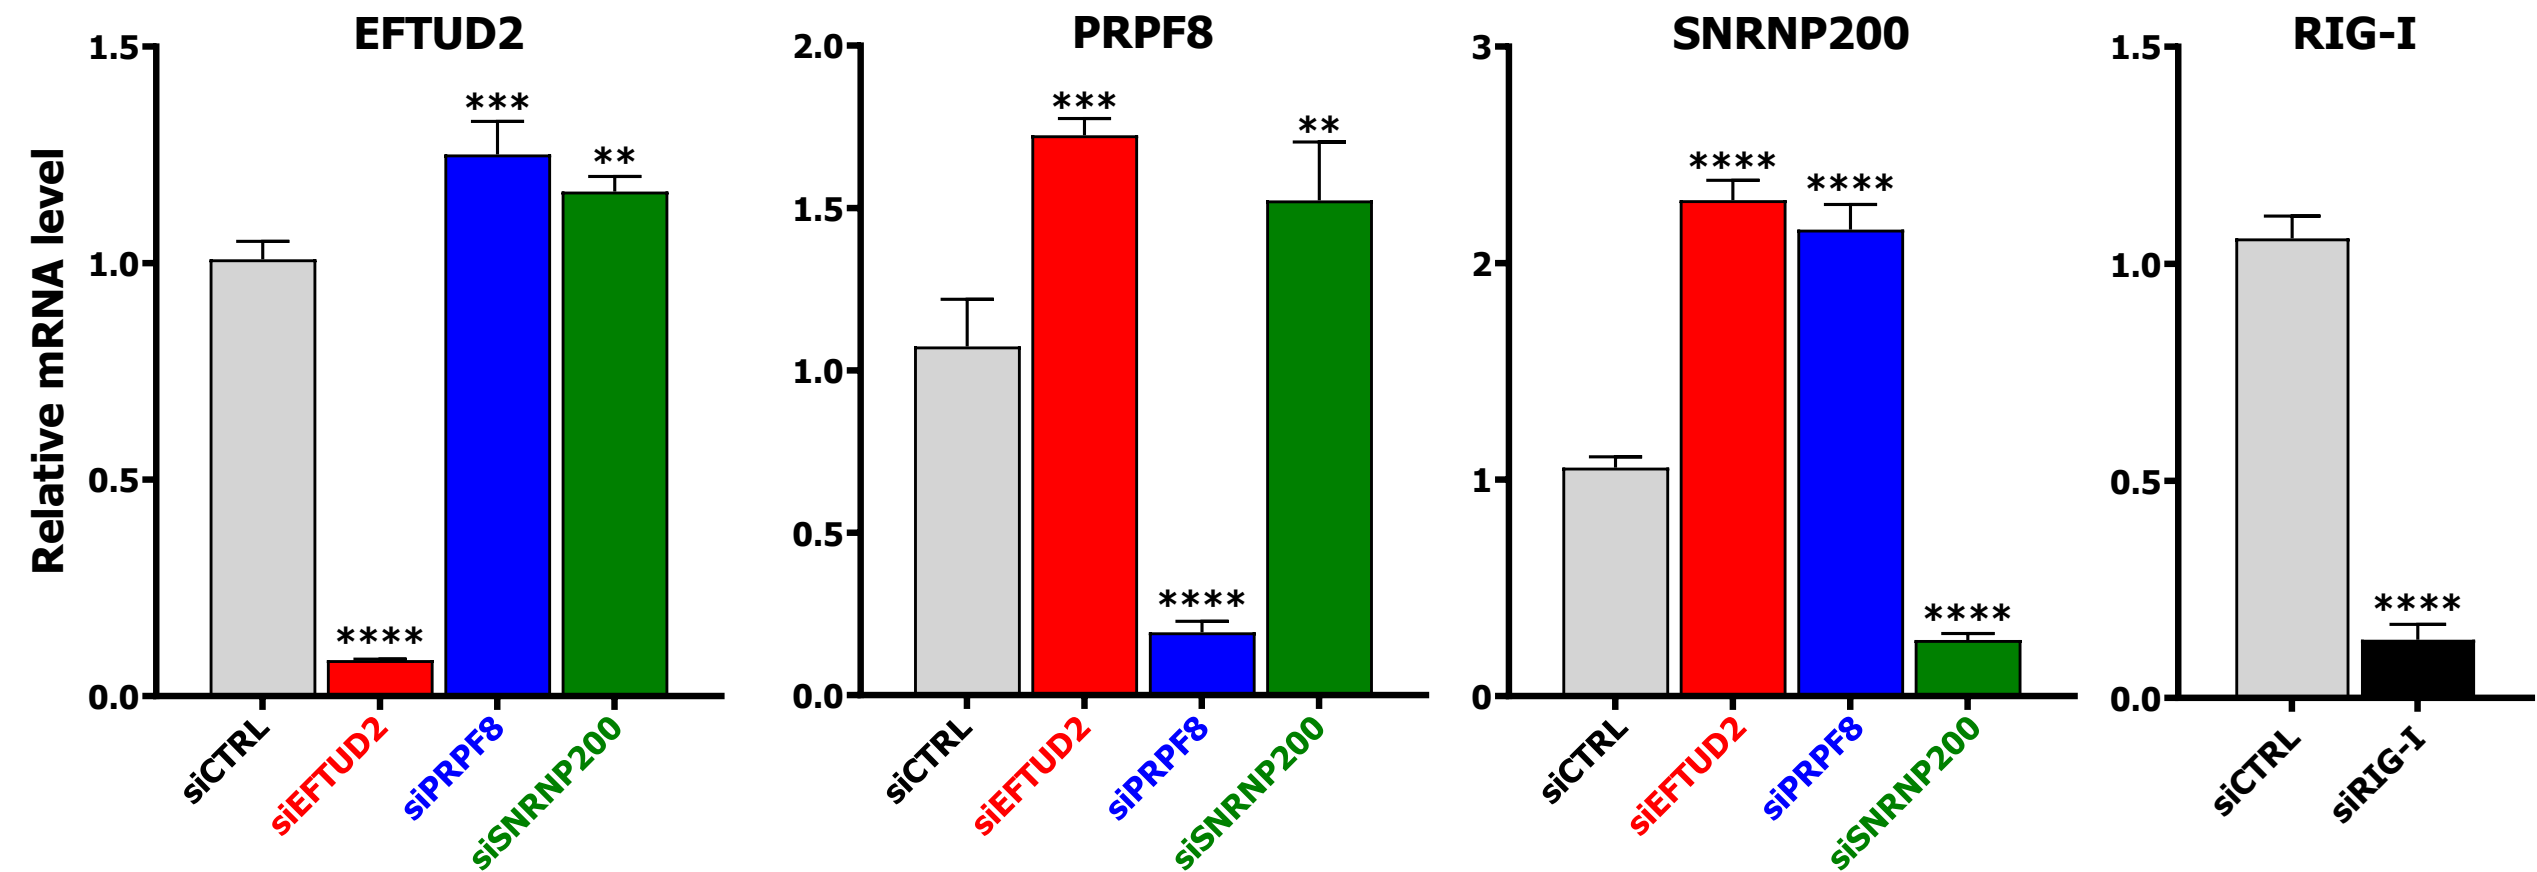

Figure S1

Figure S2. RTCA of T3D<sup>S</sup>-infected L929 cells transfected with a control siRNA or EFTUD2, PRPF8, or SNRNP200 specific siRNA. L929 cells were seeded at 5000 cells/well in E-plates and transfected the next morning with the appropriate siRNA. 55 h later, cells were infected at a MOI of 50 and monitored using the xCELLigence system. The relative cell index was normalized to the 1 h 20 min timepoint after the monitoring resumed, because the monitoring in the first hour post-infection was not stable. Measurements were taken every 10 min for up to 90 h after infection; the graph was cut at 60h because lysis was already complete by that timepoint. n=3, biological replicates.

## T3D<sup>S</sup> infected cells

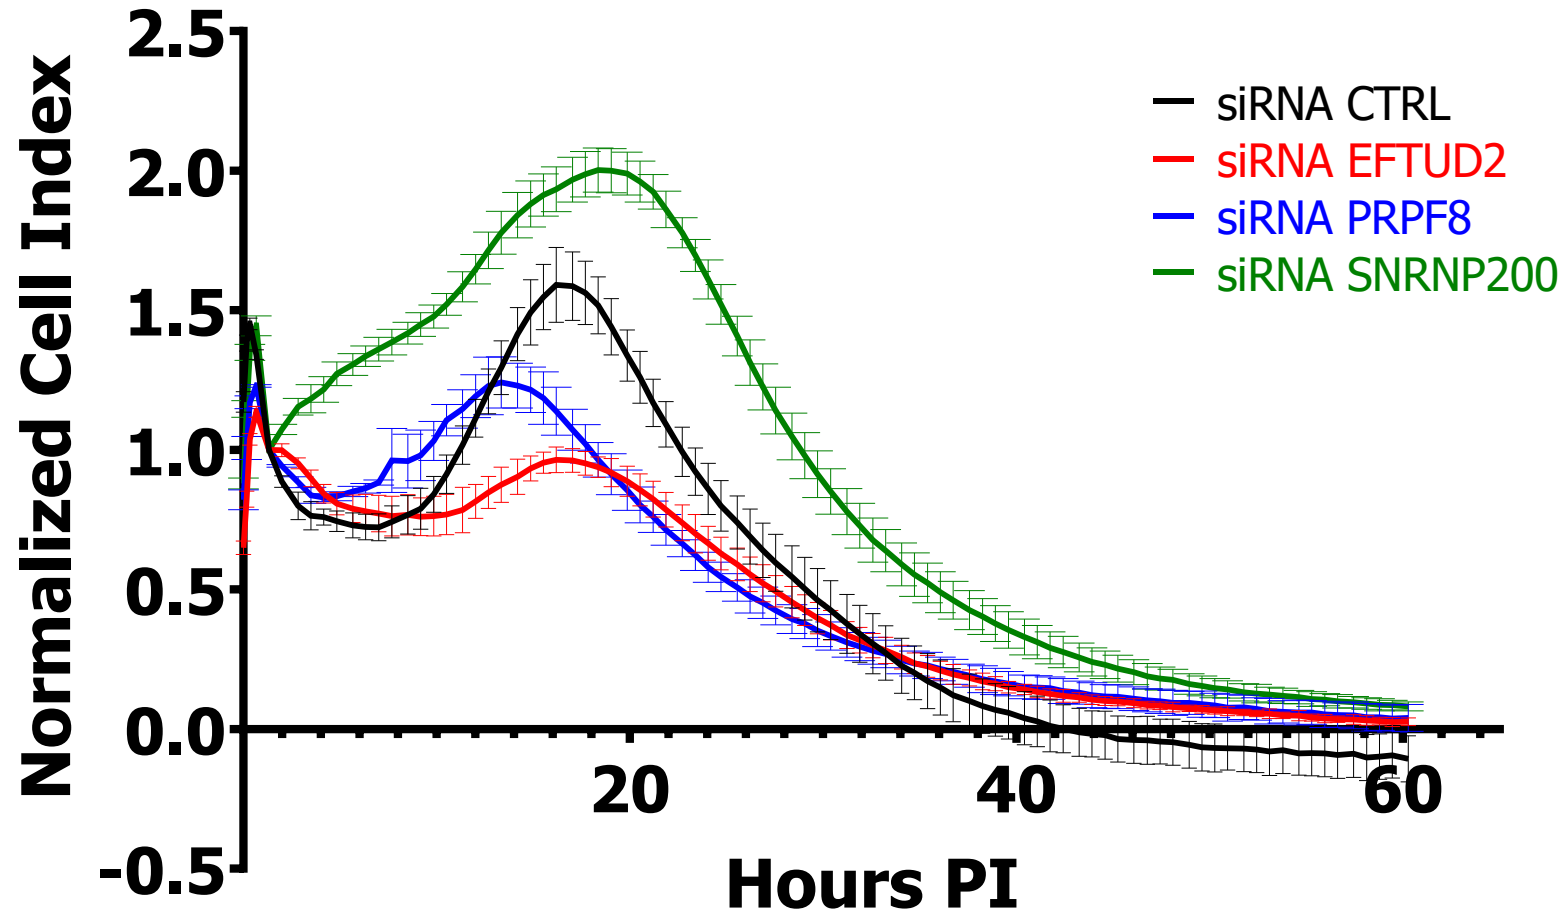

Figure S2

Figure S3. Live cell imaging of control or EFTUD2, PRPF8, or SNRNP200-depleted L929 cells treated with zVAD/TNF- $\alpha$  to induce necroptosis. Cells were transfected with the appropriate siRNA for 72 h. Then, they were pretreated for 1h with zVAD-fmk (100  $\mu$ M) before TNF- $\alpha$  (25 ng/mL) was added directly to the culture medium. Cells were then directly imaged using a Nikon TE2000E epifluorescence microscope using the differential interference contrast (DIC) channel, gain at 100, 4x objective and a 40 ms exposure time for a period of three days. The black scale bars represent 100  $\mu$ m.



zVAD-fmk + TNFa

0 h      3 h      6 h      12 h      24 h      48 h      72 h

siCTRL

siEFTUD2

siPRPF8

siSNRNP200

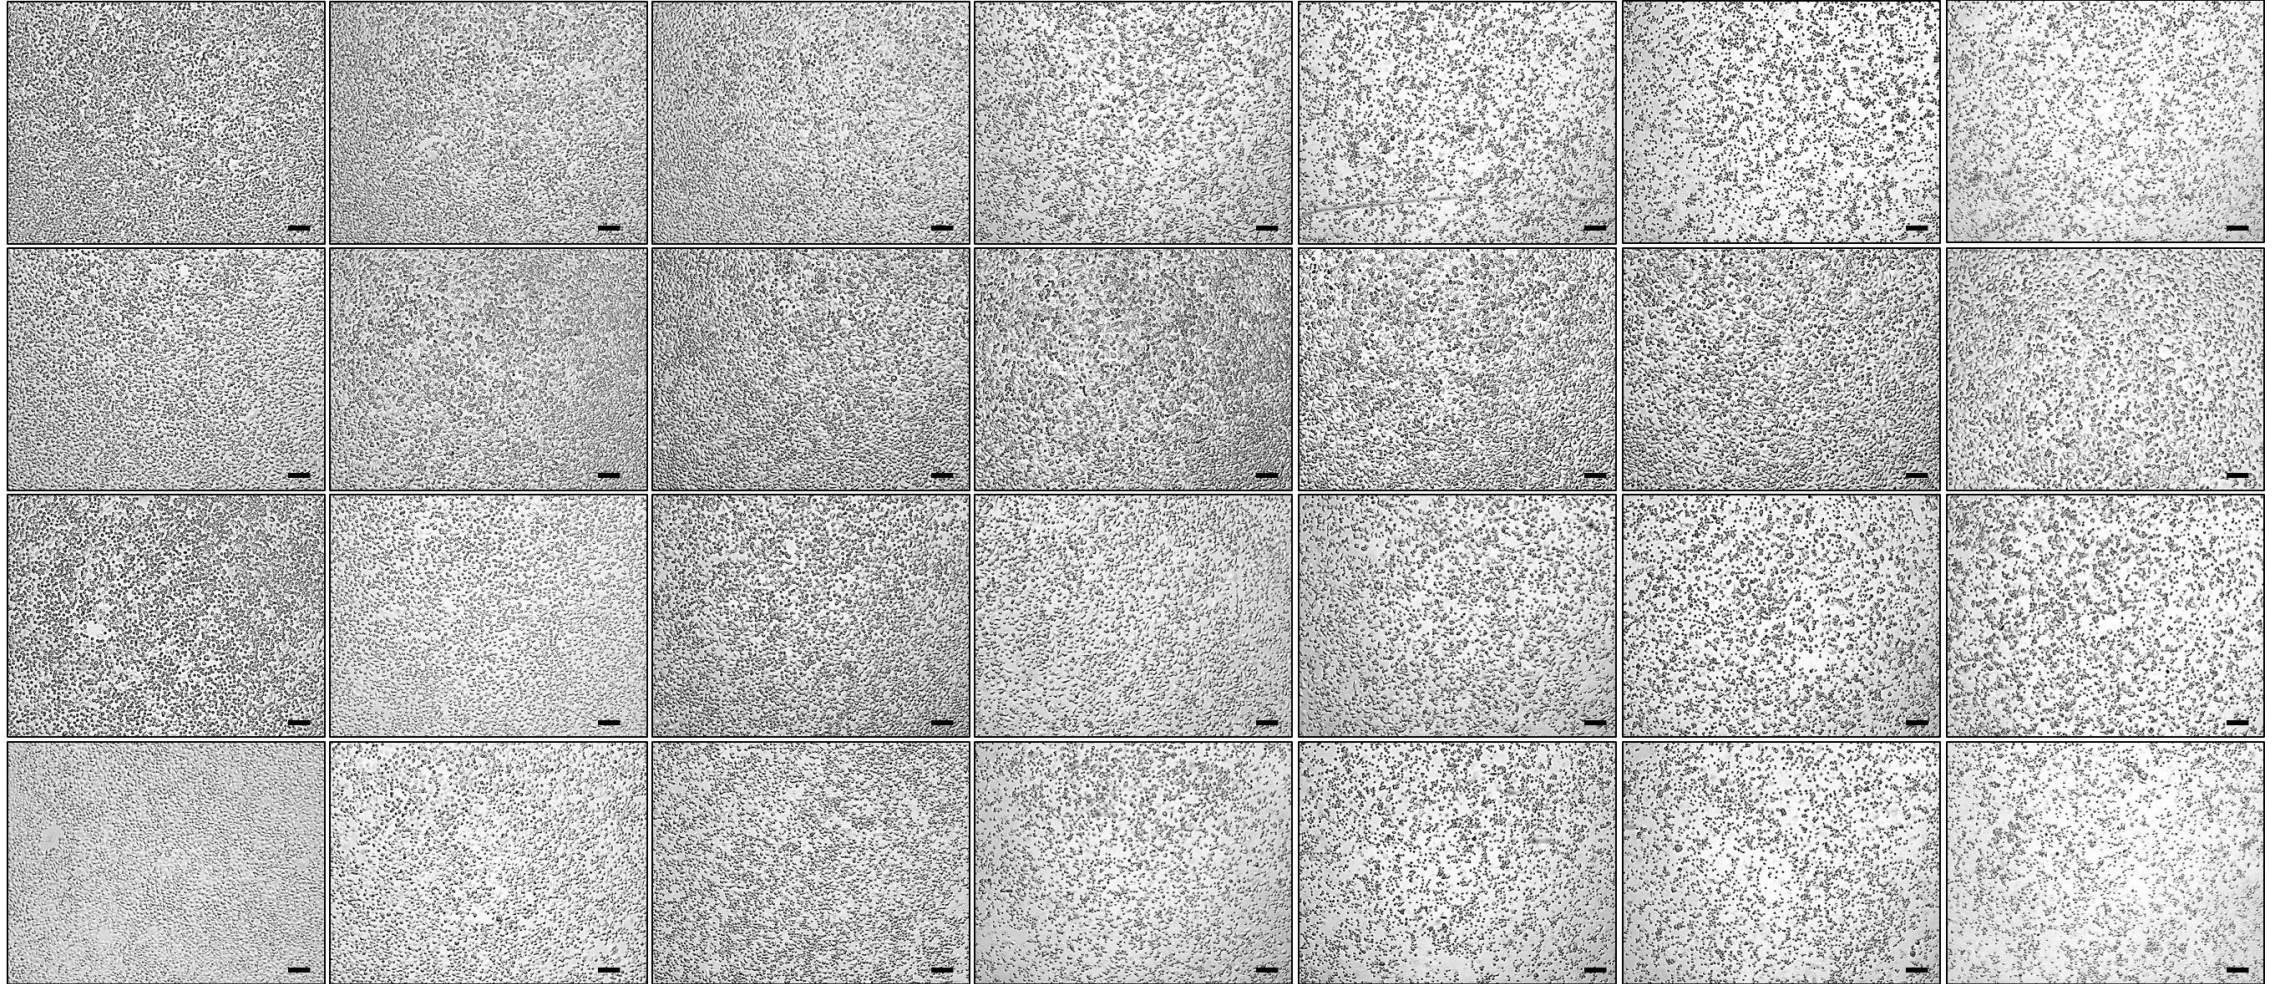

Figure S3



Figure S4. AS-PCR for the AS events in RIPK1 and RIPK3 upon EFTUD2, PRPF8 and SNRNP200 depletion. Percent Spliced In (PSI) values for the two AS event in RIPK1 and the two AS events in RIPK3 upon depletion of EFTUD2, PRPF8 and SNRNP200. The AS events are depicted on the top of the graph. n=3, biological replicates.

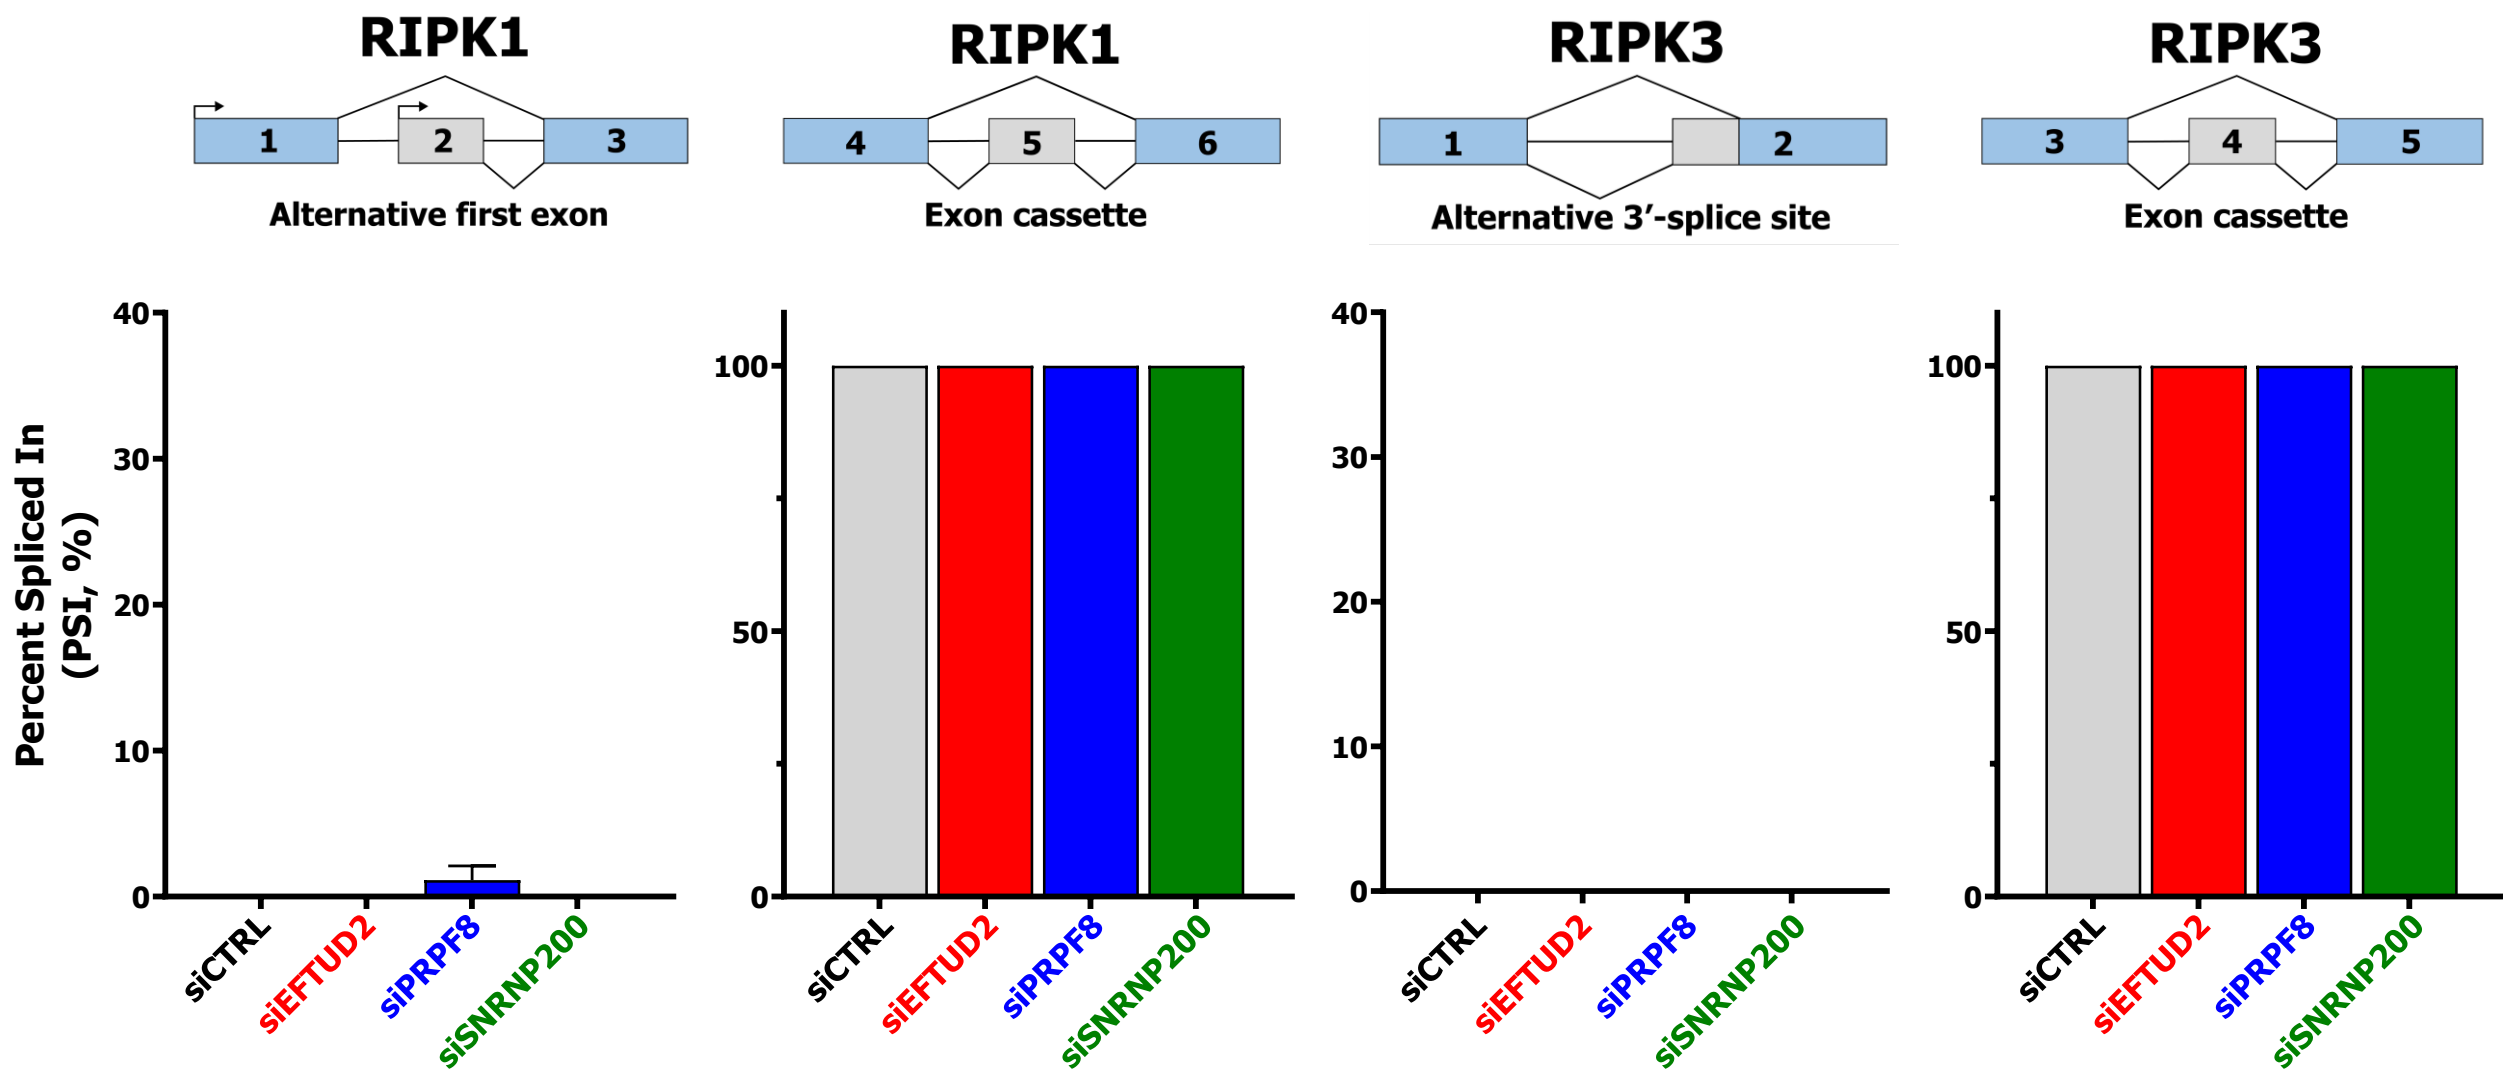

Figure S4

Figure S5. Relative fold induction upon MRV infection for *DDX60*, *IFNB1*, *MX1*, and *MX2* in control or EFTUD2, PRPF8, or SNRNP200-depleted L929 cells. L929 were transfected with the appropriate siRNA for 55 h before being either mock-infected or infected with T3D<sup>S</sup> at a MOI of 50 for 16 h. RNA was then harvested, reverse transcribed and subjected to qPCR. *PSMC4*, *PUM1*, and *TXNL4B* were used as housekeeping genes for normalization. Each replicate was arbitrarily attributed an uninfected control sample to calculate a fold-change upon infection. Since the variance ratio was superior to 1.5, Brown-Forsythe and Welch one-way ANOVA with Dunnett's T3 multiple comparisons test against the control siRNA condition was used for every comparison. The only exception was the comparison between siPRPF8 and siCTRL for IFNB1, where the variance ratio was inferior to 1.5 and one-way ANOVA with Dunnett's multiple comparisons test against the control siRNA condition was applied. n=3, biological replicates (ns,  $P > 0.05$ ; \*\*,  $P \leq 0.01$ ; \*\*\*,  $P \leq 0.001$ ).

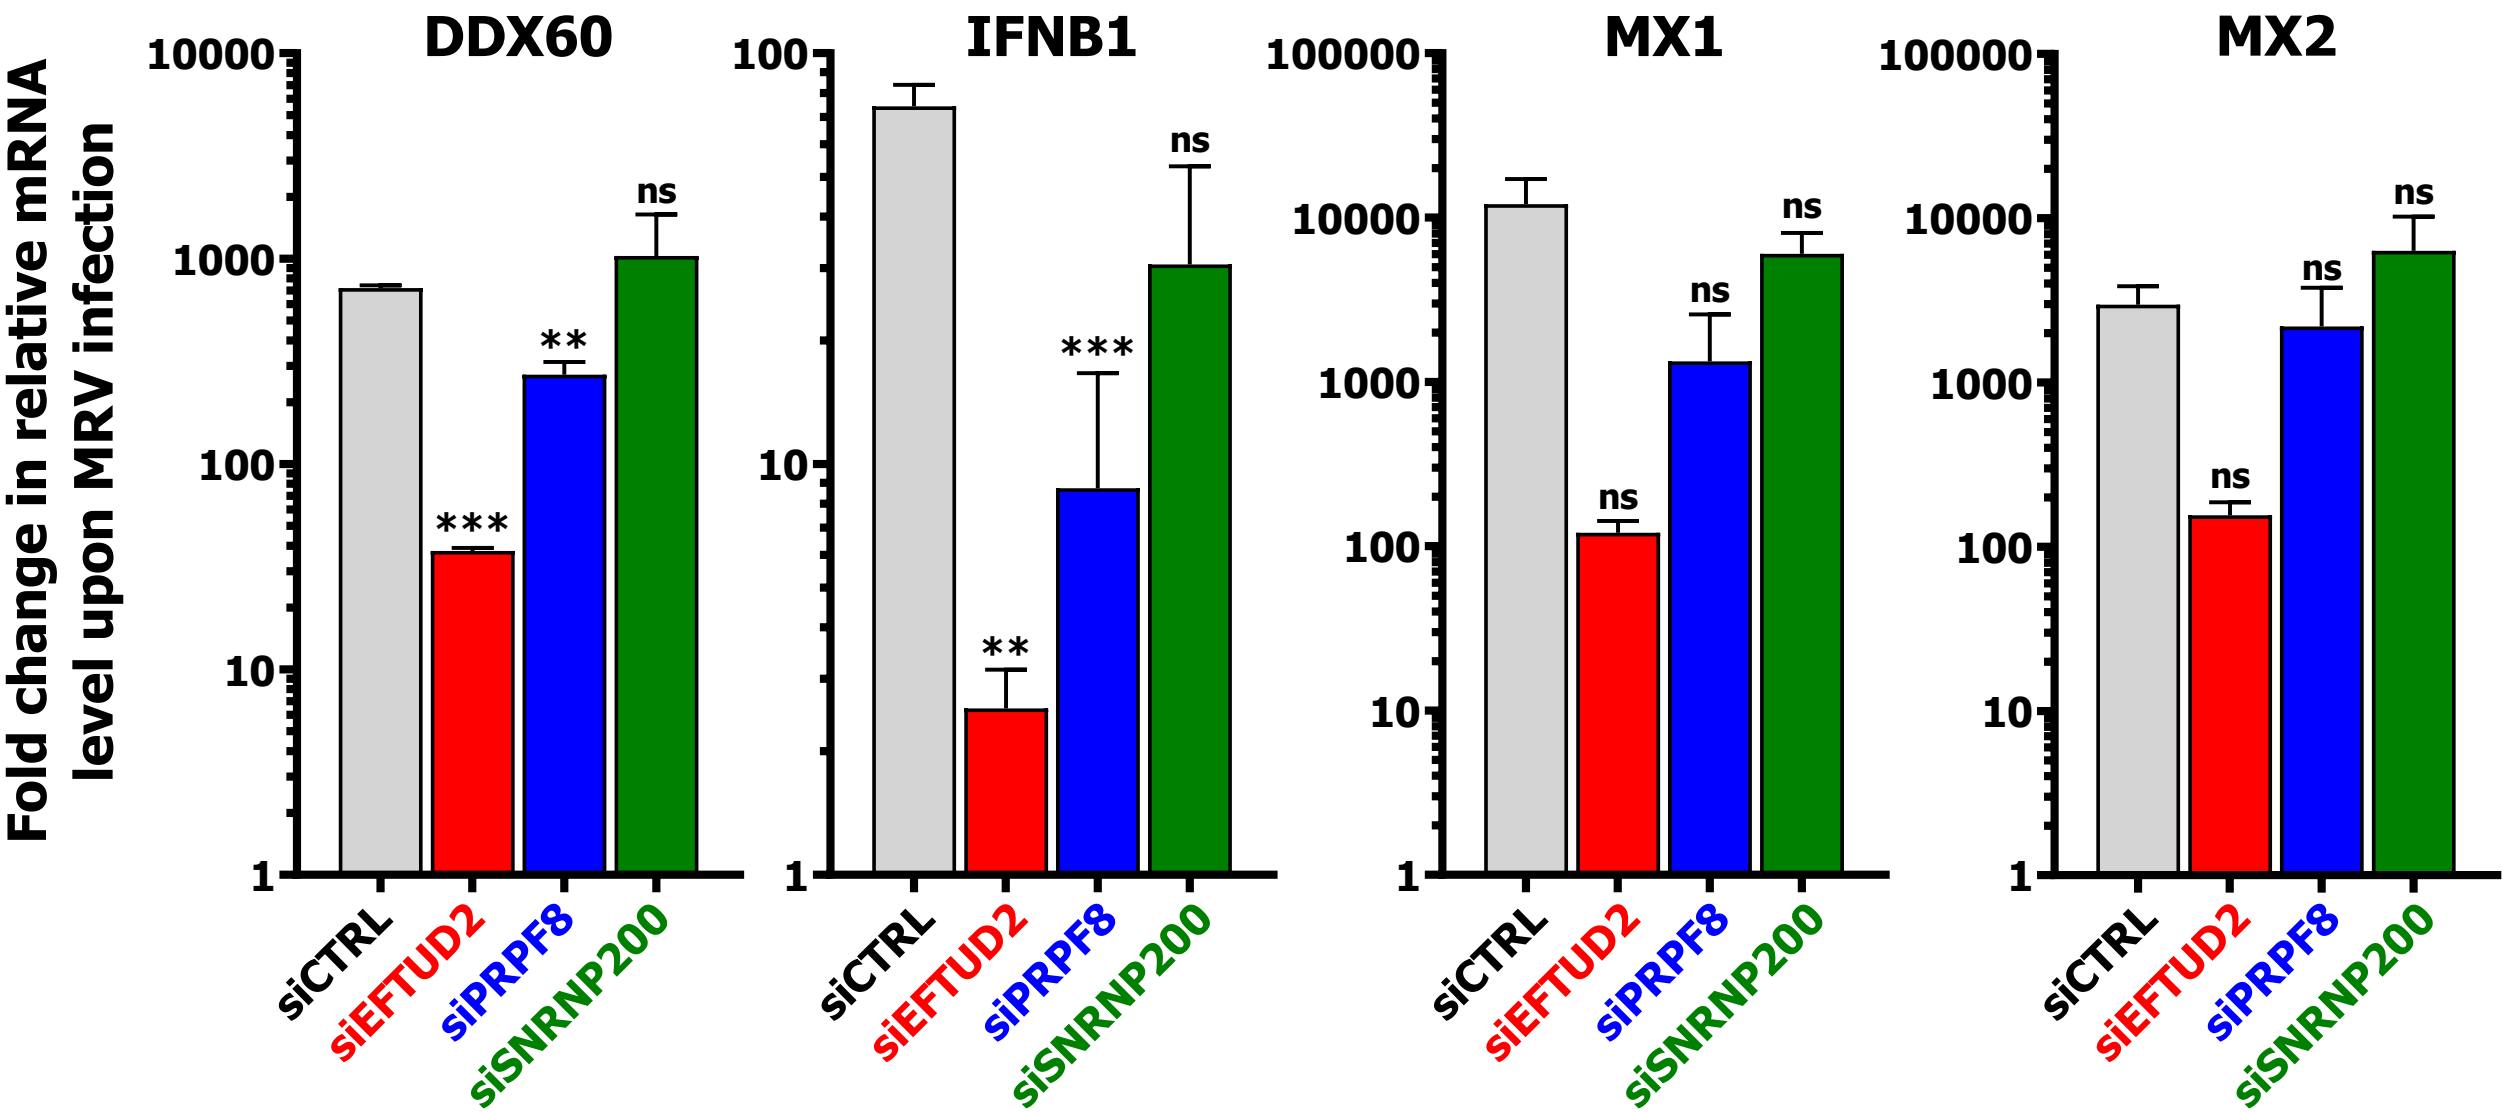

Figure S5

Figure S6. Relative mRNA levels for *DDX60*, *IFNB1*, *MX1*, and *MX2* in L929 cells treated with logarithmic dilutions of IFN- $\beta$ . L929 were transfected with a control siRNA for 72 h before IFN- $\beta$  (0.0001 U/mL to 1000 U/mL) was added for 5 h. RNA was then harvested, reverse transcribed and subjected to qPCR. *PSMC4*, *PUM1*, and *TXNL4B* were used as housekeeping genes for normalization. n=1, technical triplicates.

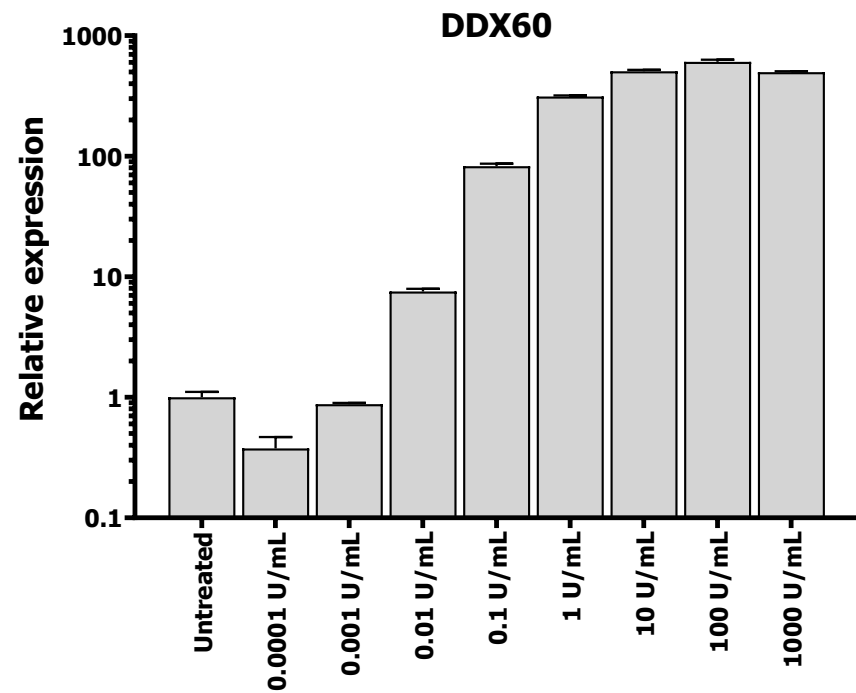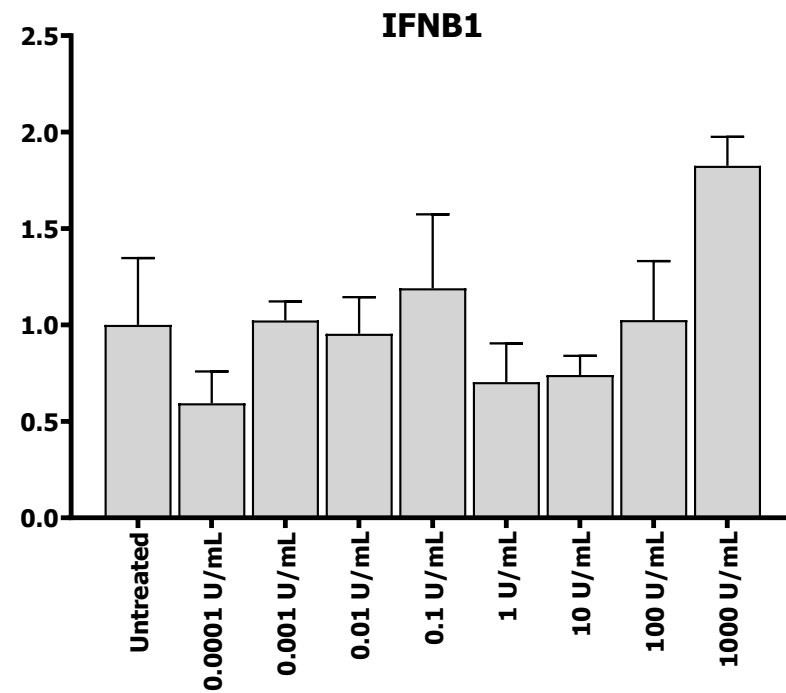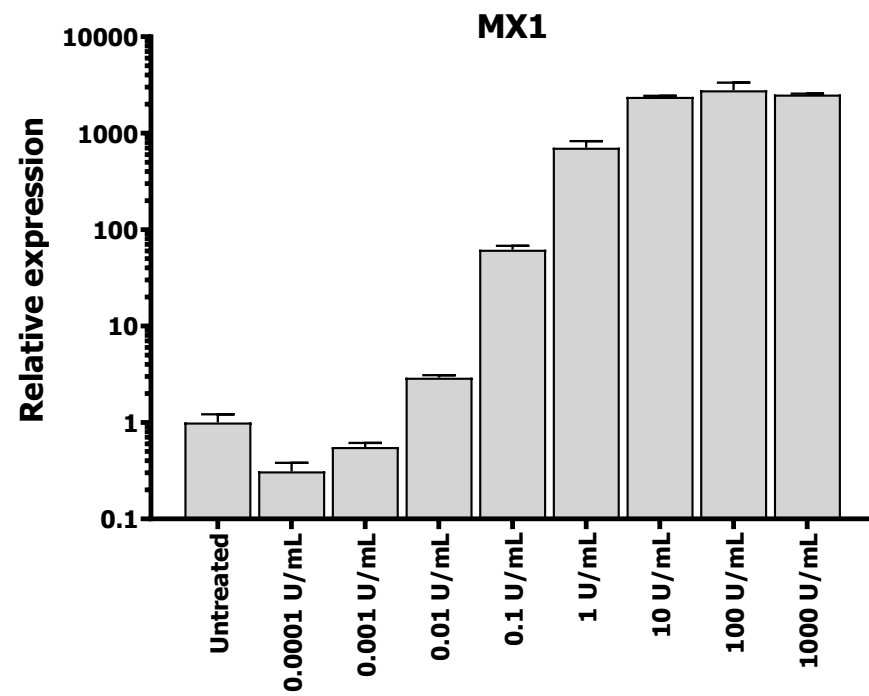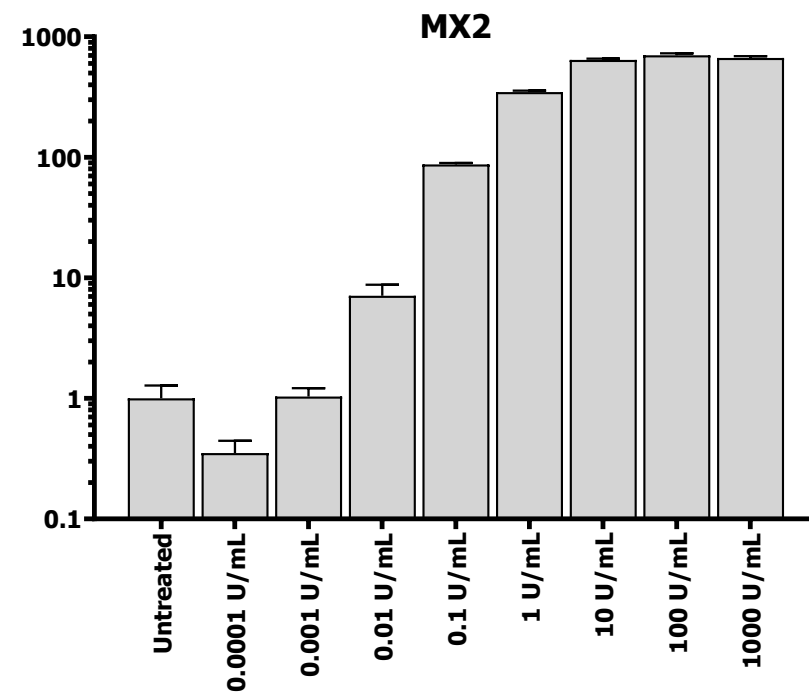

Figure S6

Figure S7. Methylene blue staining of control, EFTUD2, RIG-I, or RIG-I/EFTUD2-depleted L929 cells infected with binary dilutions of T3D<sup>S</sup> at 72 h or 96 h post-infection. Twice the quantity of siRNA was transfected to perform the DKD; in the case of a single KD, siCTRL was added to match the total siRNA quantity of the DKD. The quantification of cell-bound methylene blue stain is shown for three independent experiments. n=3, biological replicates, two-way ANOVA with Dunnett's multiple comparisons test against the EFTUD2 KD condition (in red; \*,  $P \leq 0.05$ ; \*\*,  $P \leq 0.01$ ). If not indicated, results are not statistically significant. The results of the comparison against the control siRNA (in black) are not indicated for clarity purpose.



## EFTUD2/RIG-I

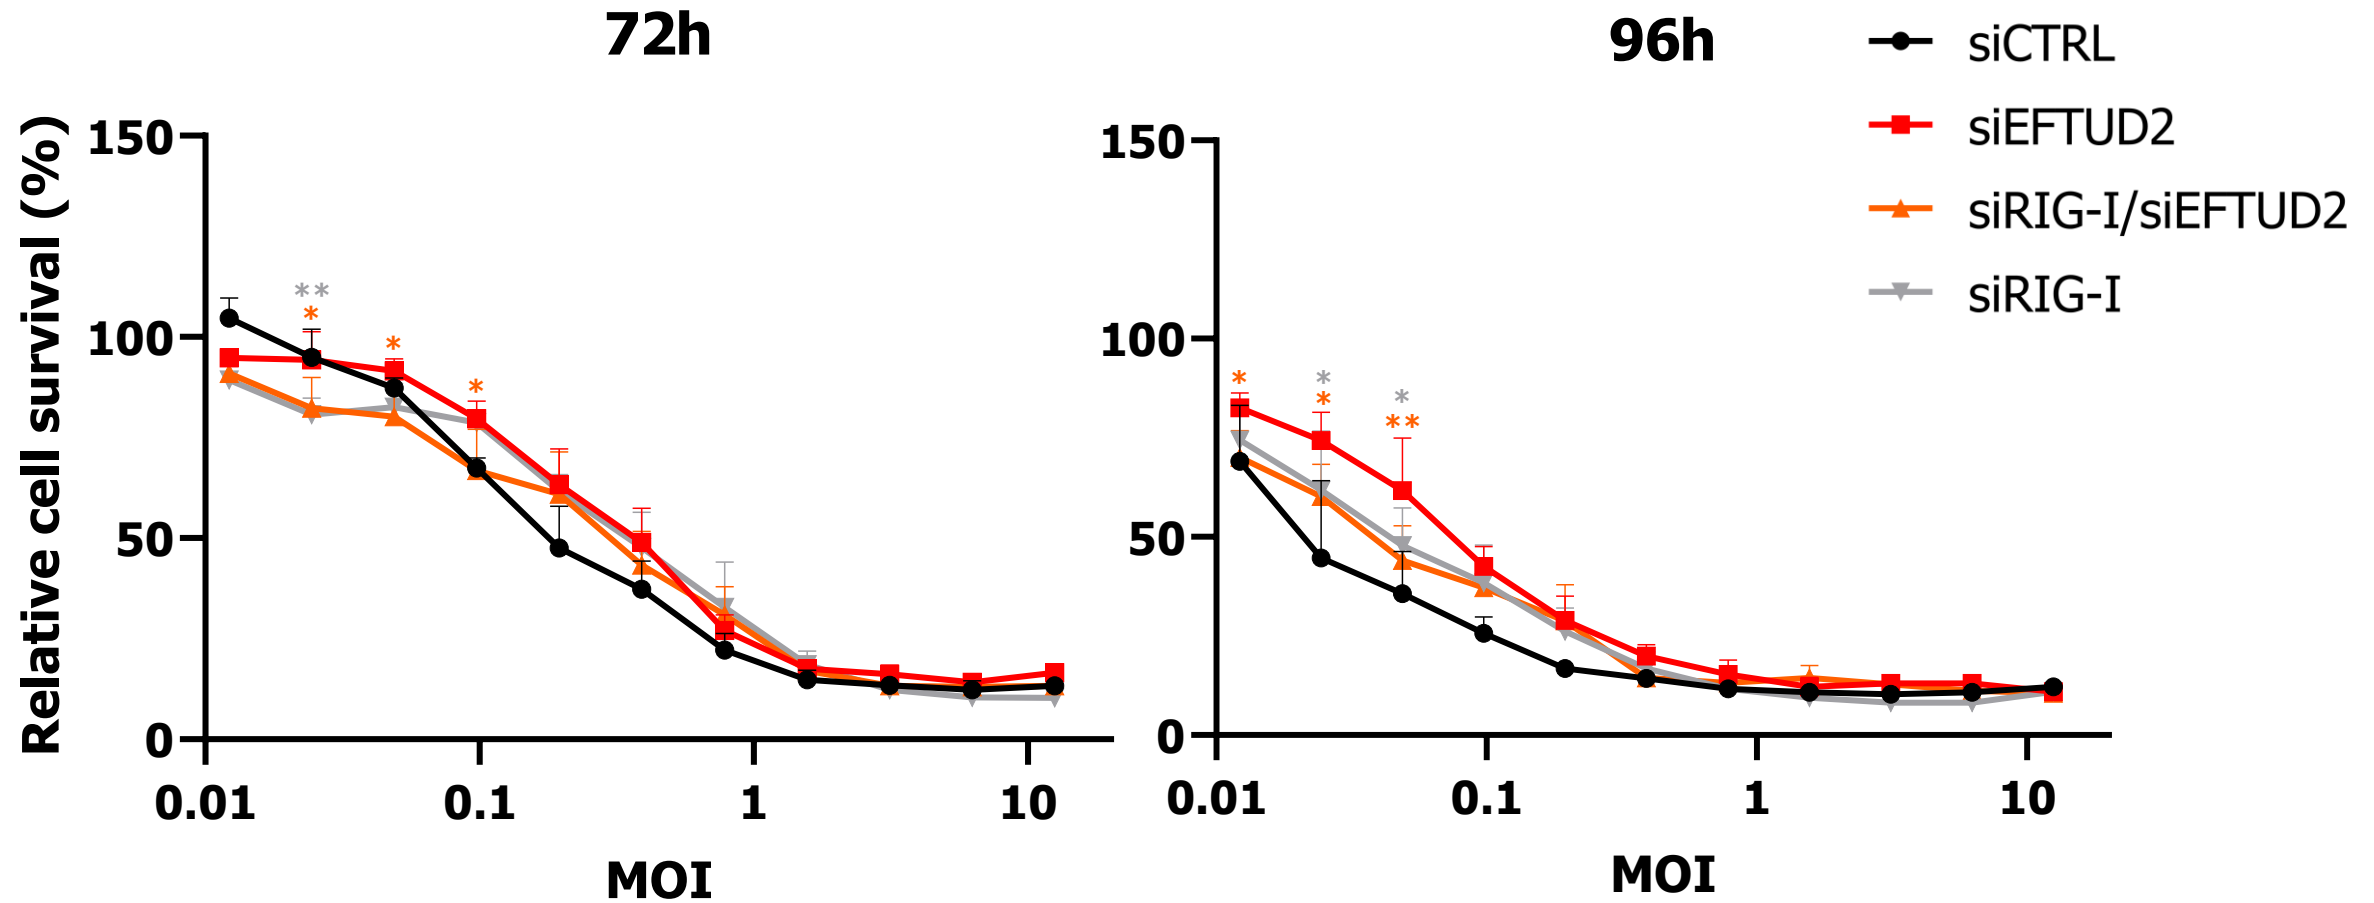

Figure S7

Figure S8. Western blot of phosphorylated MLKL (pMLKL) and total MLKL in mock- or T3D<sup>S</sup>-infected cells treated with necroptosis inhibitors (GSK872, GSK963) or apoptosis inhibitor (zVAD-fmk). L929 cells were infected at an MOI of 3 and left untreated or treated with the RIPK3 inhibitor GSK872 (3  $\mu$ M), the RIPK1 inhibitor GSK963 (3  $\mu$ M) or the pan-caspase inhibitor zVAD-fmk (100  $\mu$ M) for 40 h before proteins were harvested. Relative quantitation is shown for pMLKL/MLKL.

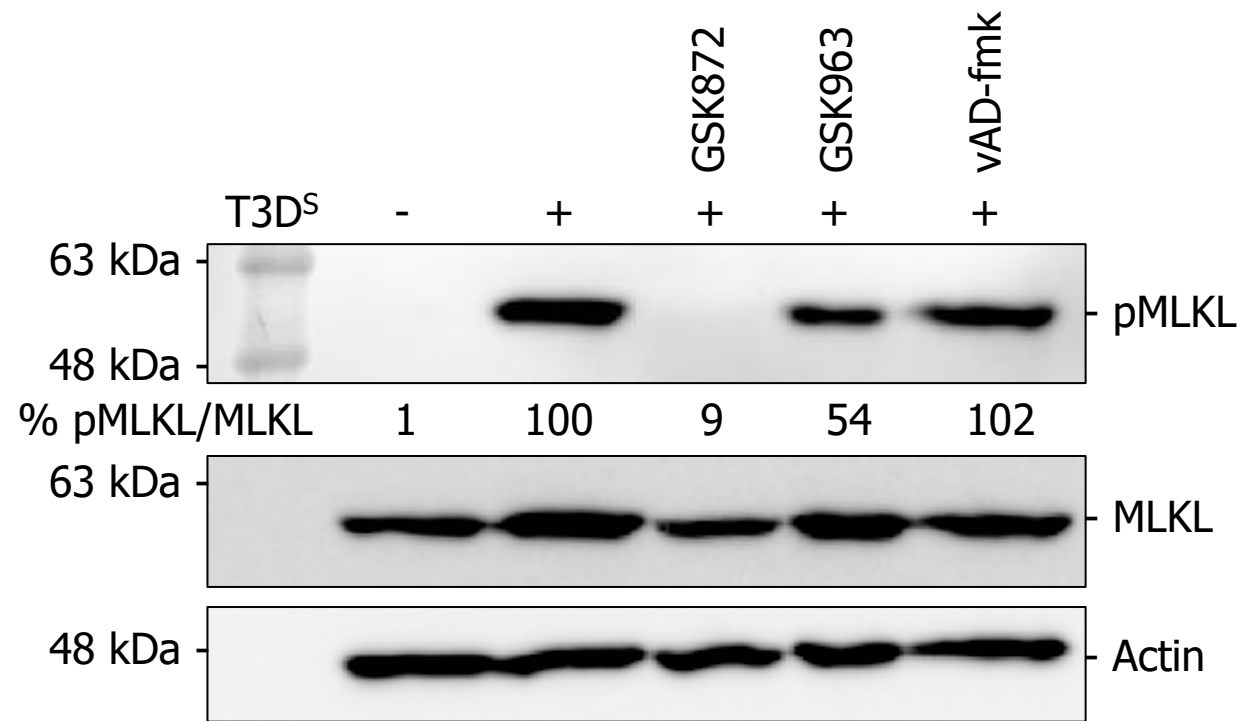

Figure S8

Figure S9. Gene ontology (GO) analysis of the protein interactors for key necroptotic regulators RIPK1, RIPK3 and MLKL. Protein interactors were retrieved from the Harmonizome database<sup>1</sup> (RIPK1, 137 interactors; RIPK3, 112 interactors; MLKL, 537 interactors). The gene ontology analysis of the interactors was performed using DAVID web server<sup>2</sup> with the gene ontology (biological process or cellular compartment) direct function. The complete list of human genes was used as the background. The Bonferroni correction was used to correct for multiple statistical tests.

<sup>1</sup>Rouillard, A. D. *et al.* The harmonizome: a collection of processed datasets gathered to serve and mine knowledge about genes and proteins. *Database* 2016, baw100 (2016).

<sup>2</sup>Sherman, B. T. *et al.* DAVID: a web server for functional enrichment analysis and functional annotation of gene lists (2021 update). *Nucleic Acids Research* gkac194 (2022) doi:10.1093/nar/gkac194.

# Biological Process

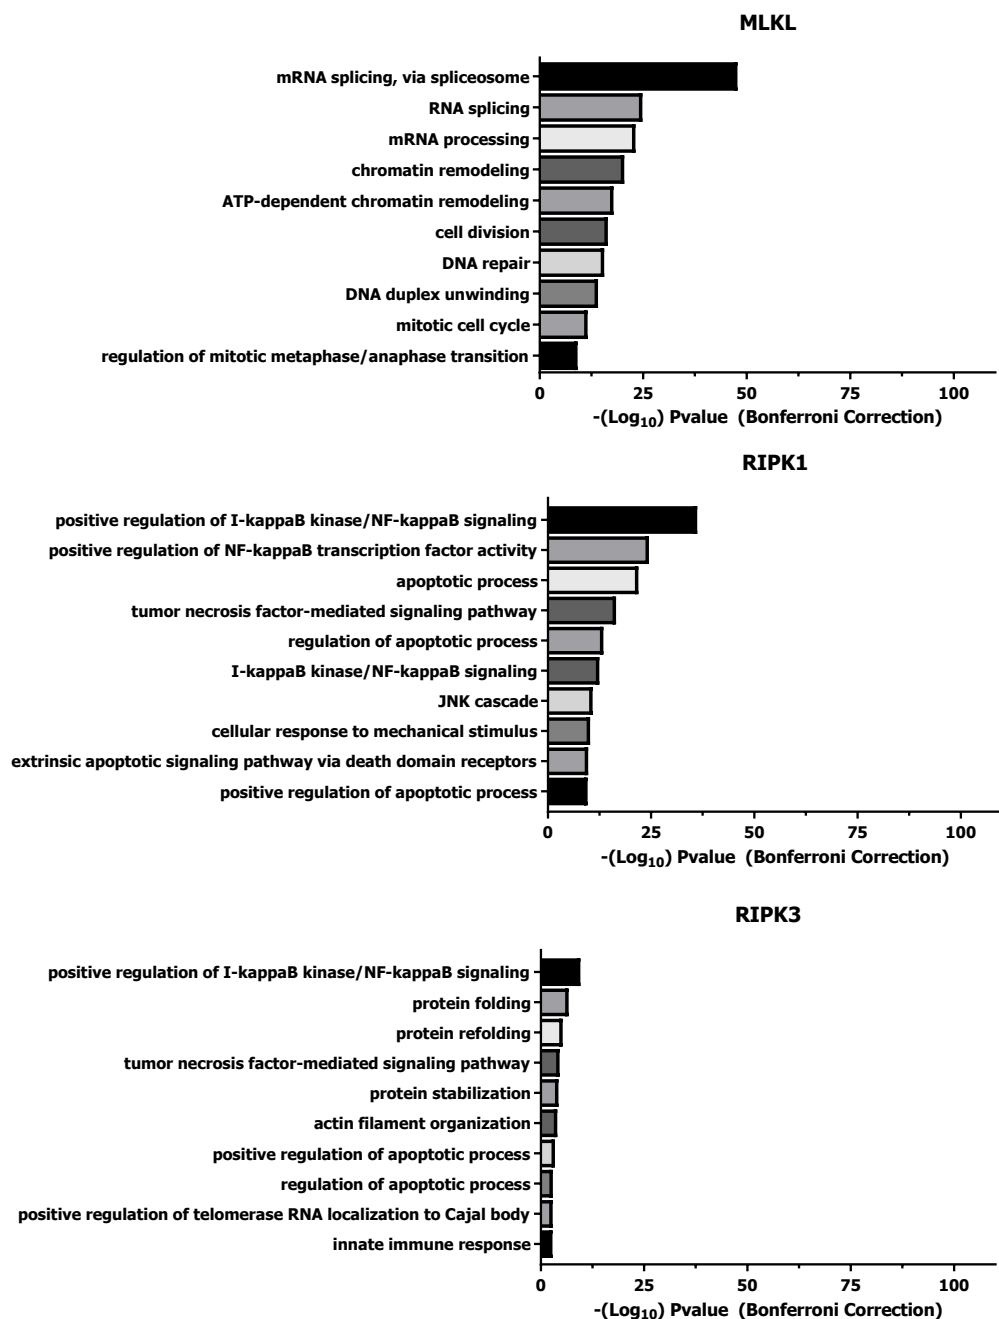

# Cellular Compartment

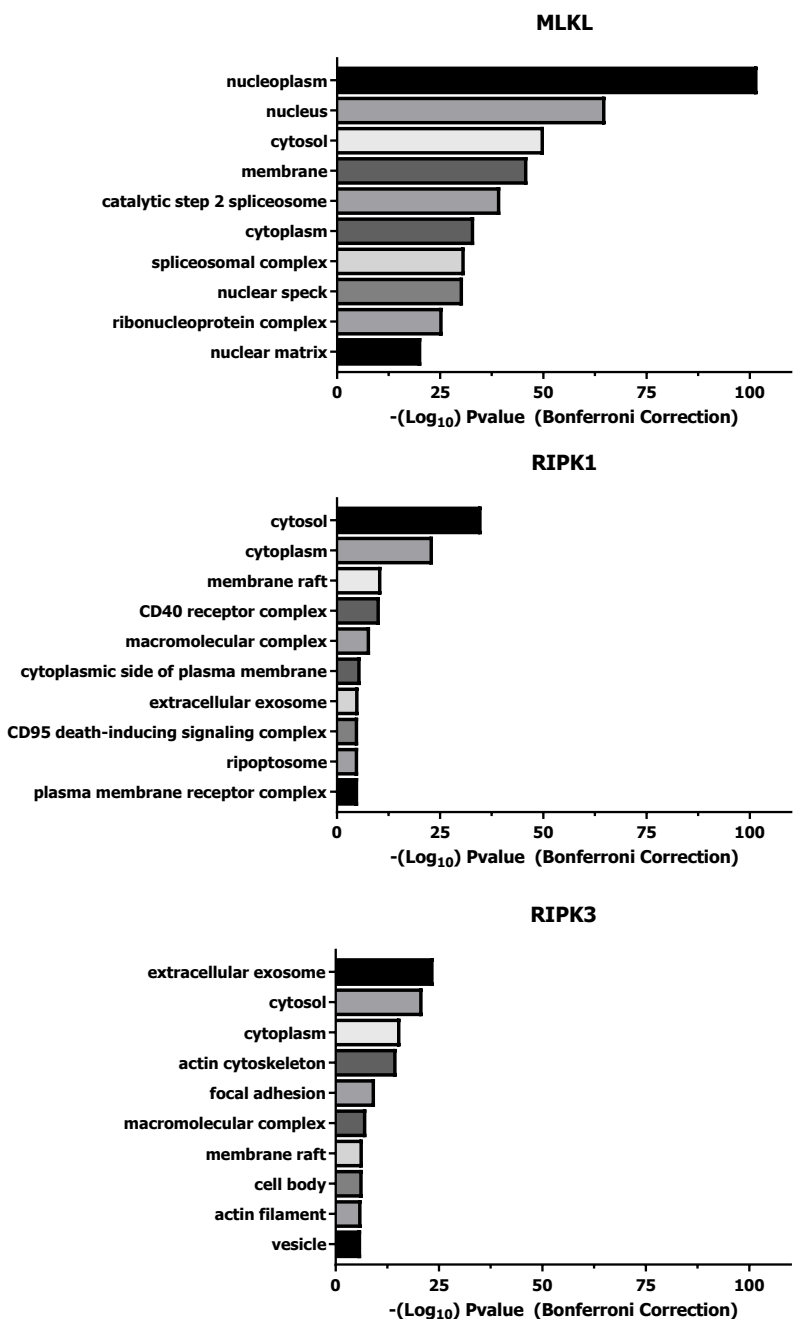

Figure S9

Figure S10. Design maps for the ASE analyzed by AS-PCR in L929 cells. All the RNA isoforms for each gene are depicted alongside their ENSEMBL transcript ID. The primers, designed to amplify the region alternatively spliced, are shown as gray rectangles. On the bottom, a predicted size for the PCR amplicon is given for each transcript. Maps were generated using the mouse assembly GRCm38 (v92) from Ensembl.

# MLKL

GeneTagGroup on 8- Mouse|NCBI|38.p1 (1 gene tags)

ENSMUSG00000012519(MLKL)|EnsEMBL|MM92.GRCn38Y

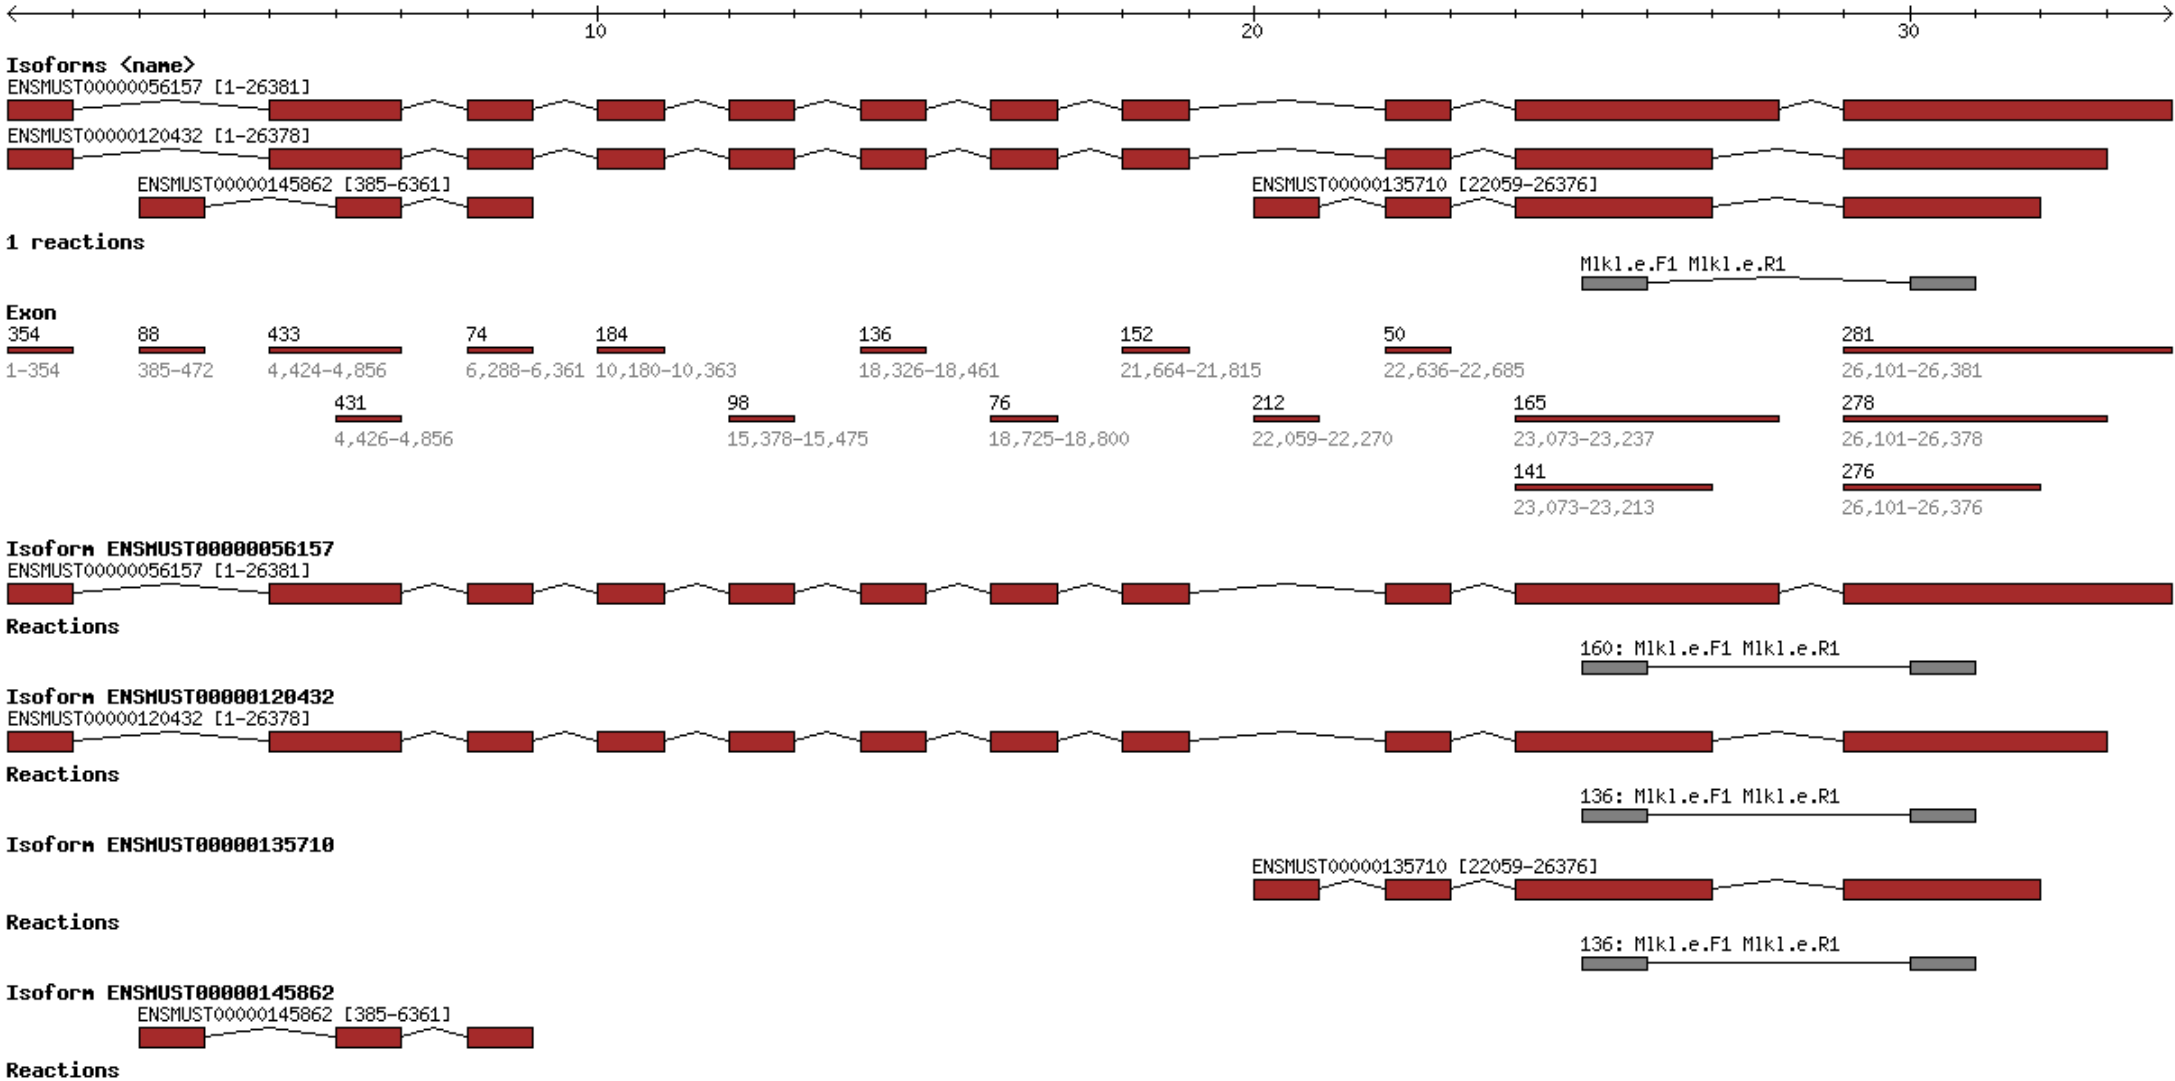

Figure S10

# RIPK1

GeneTagGroup on 13+ Mouse|NCBI|38.p1 (1 gene tags)

ENSMUSG00000021408(Ripk1)|EnsEMBL|HMM92.GRCm38Y

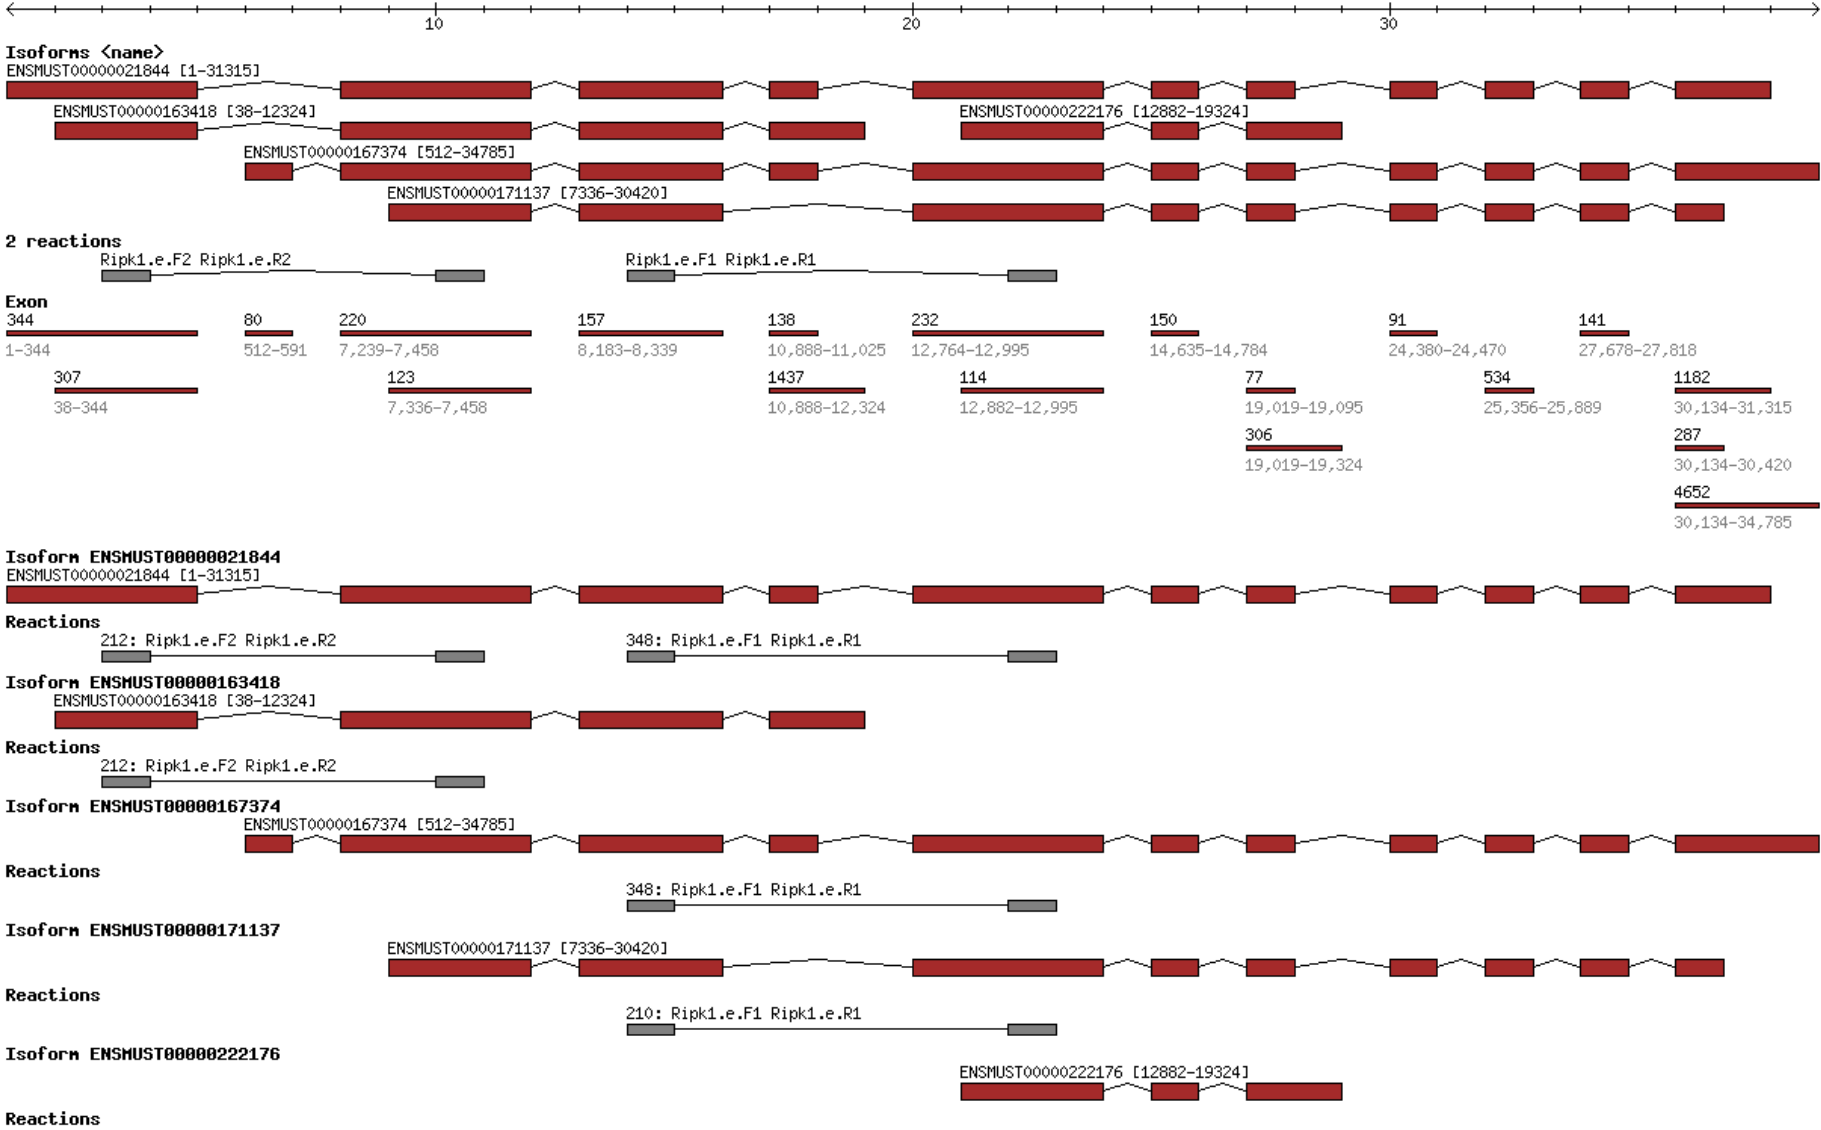

Figure S10 (cont'd)



# RIPK3

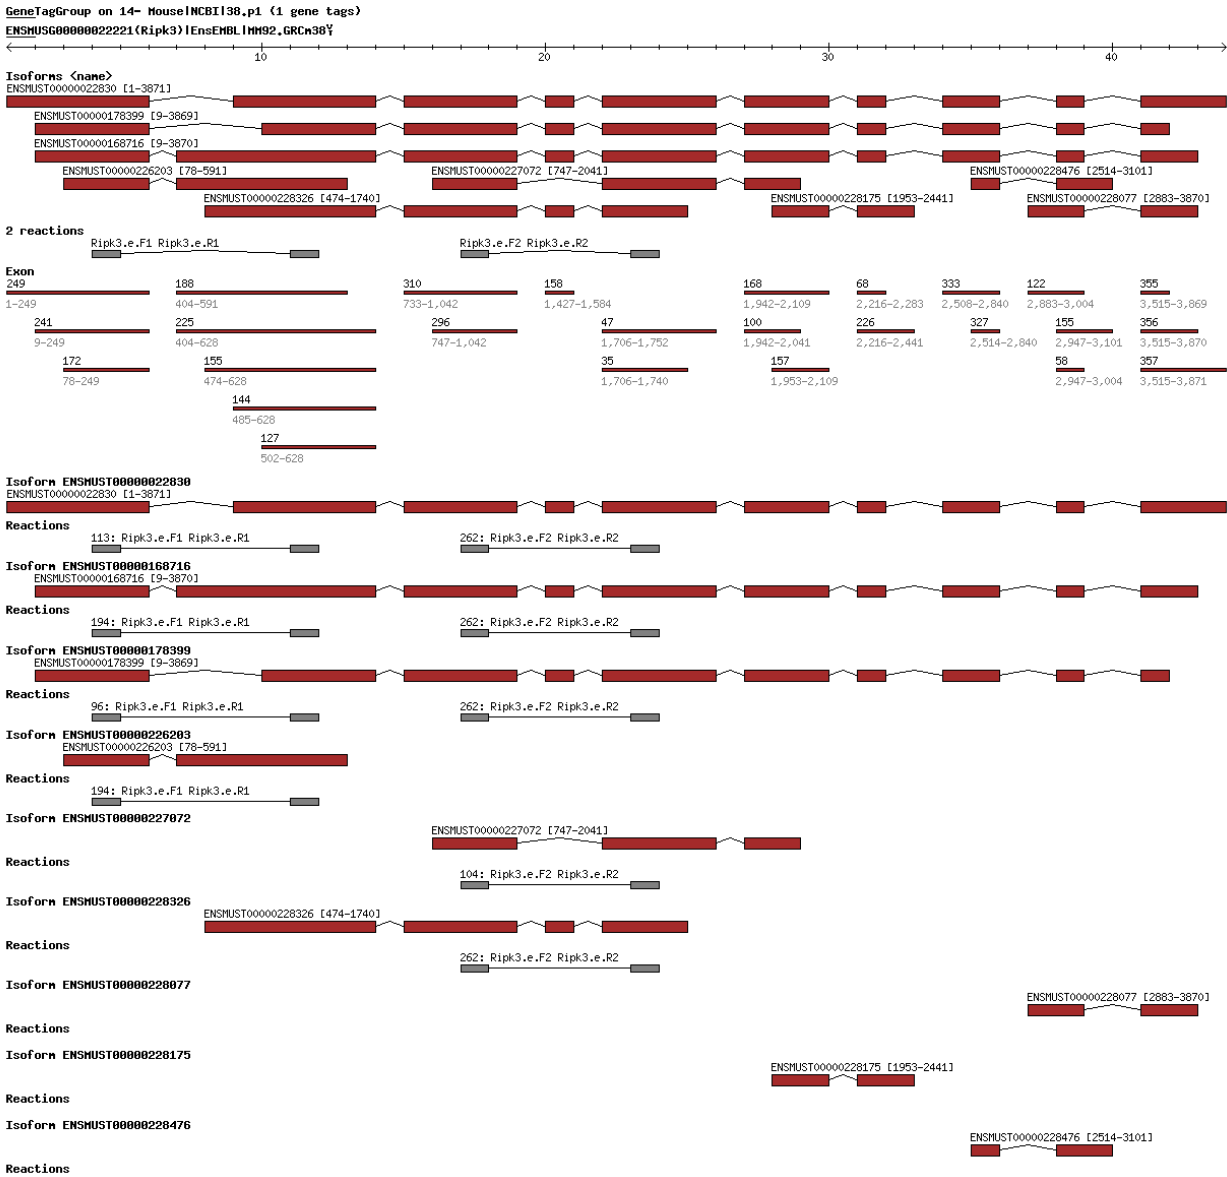

Figure S10 (cont'd)

Figure S11. Uncropped western blots from this study.

Figure 3A

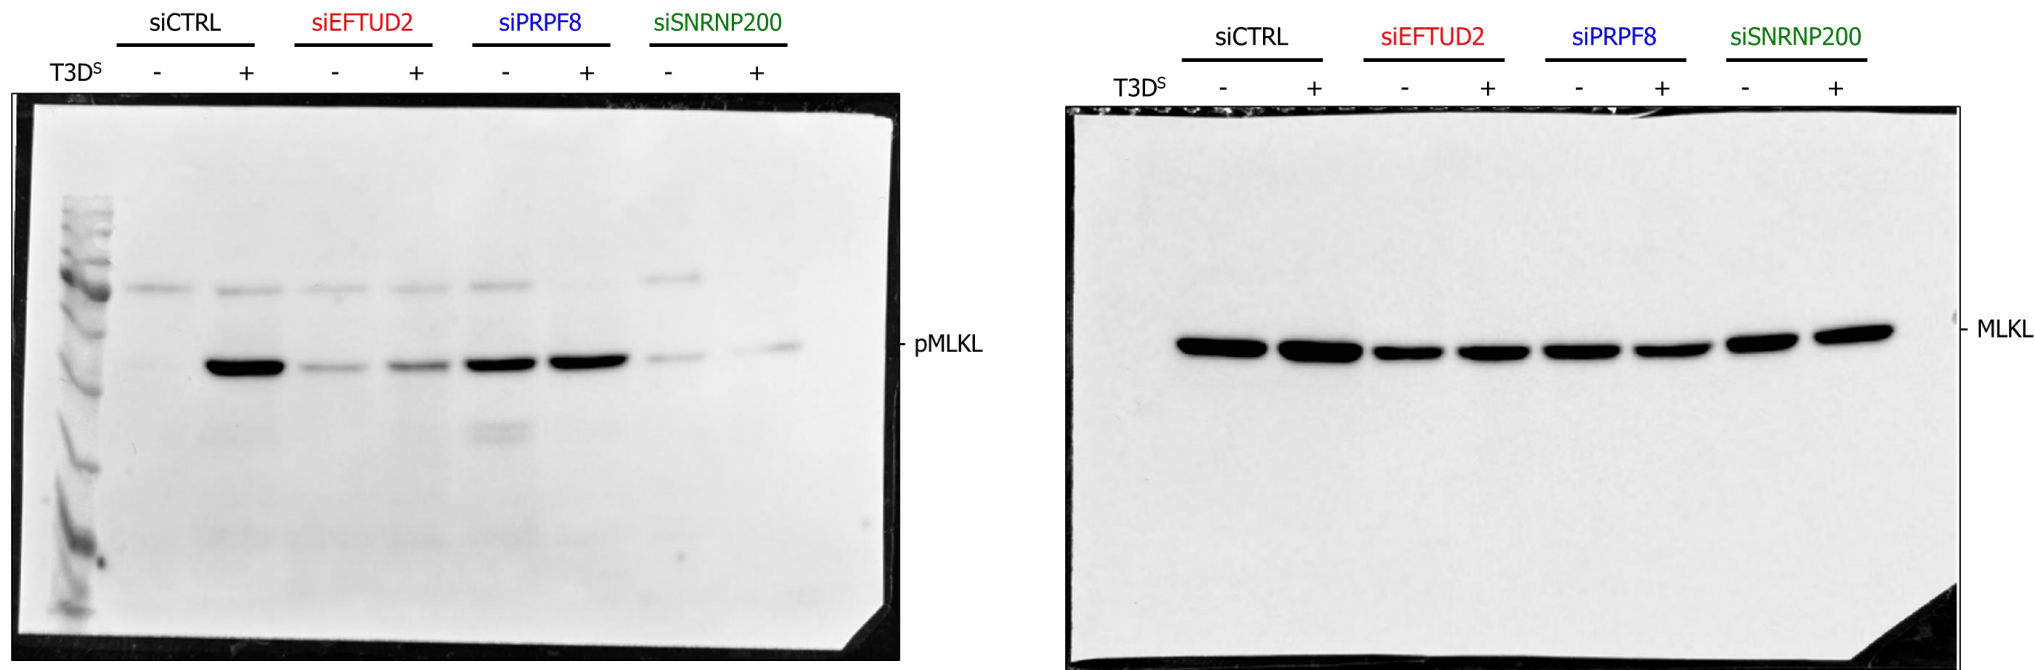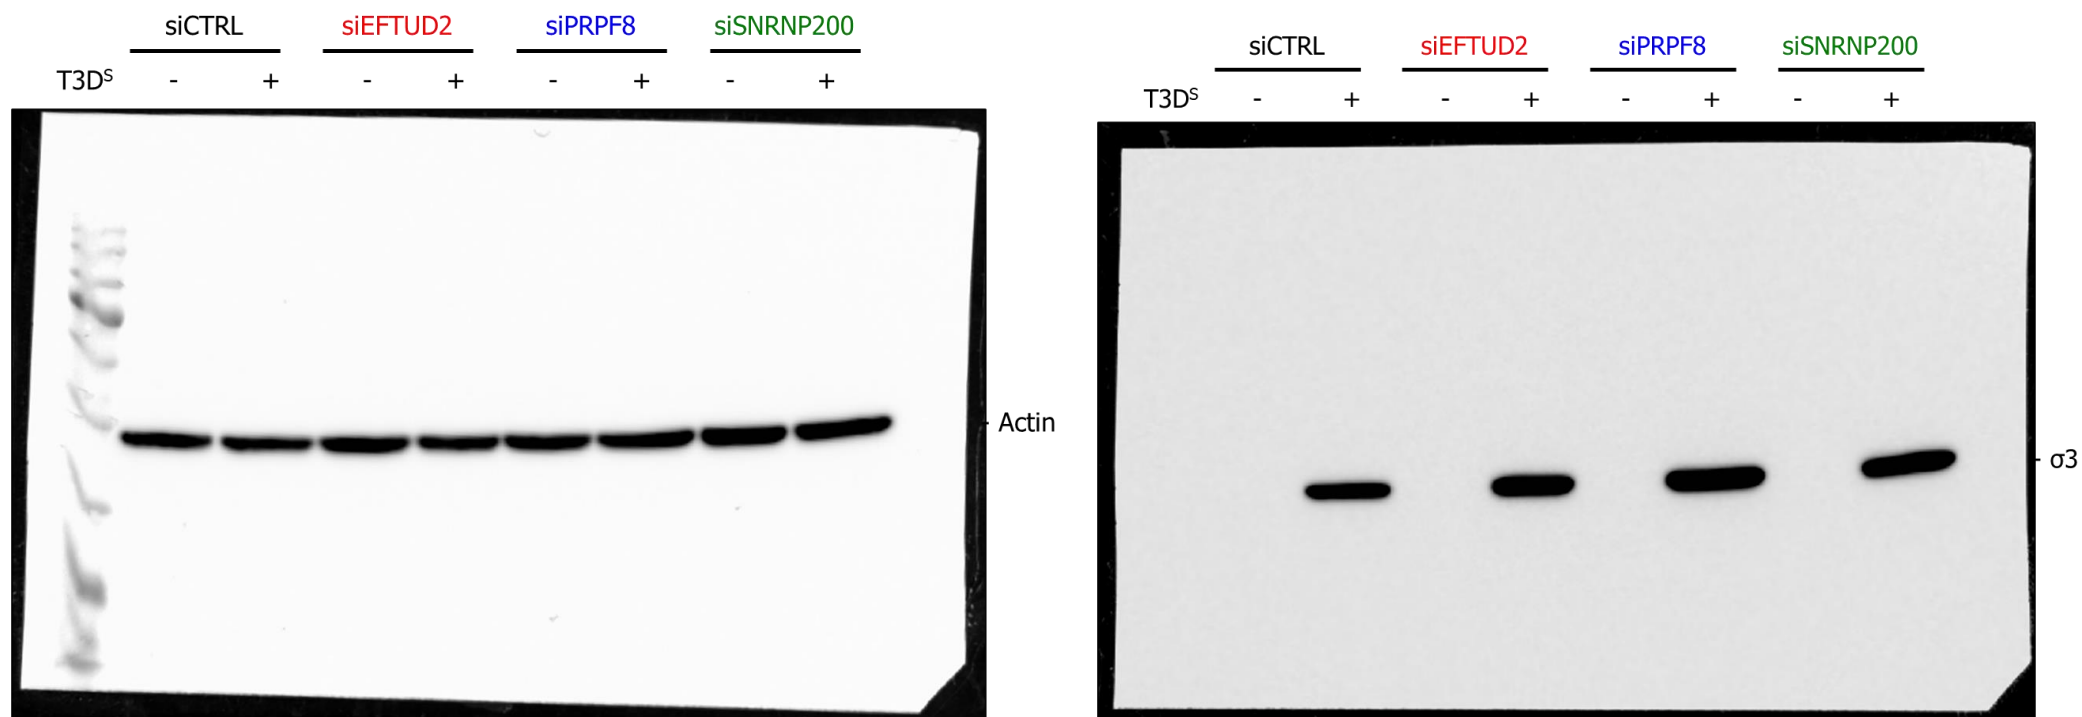

Figure S11

Figure 3D

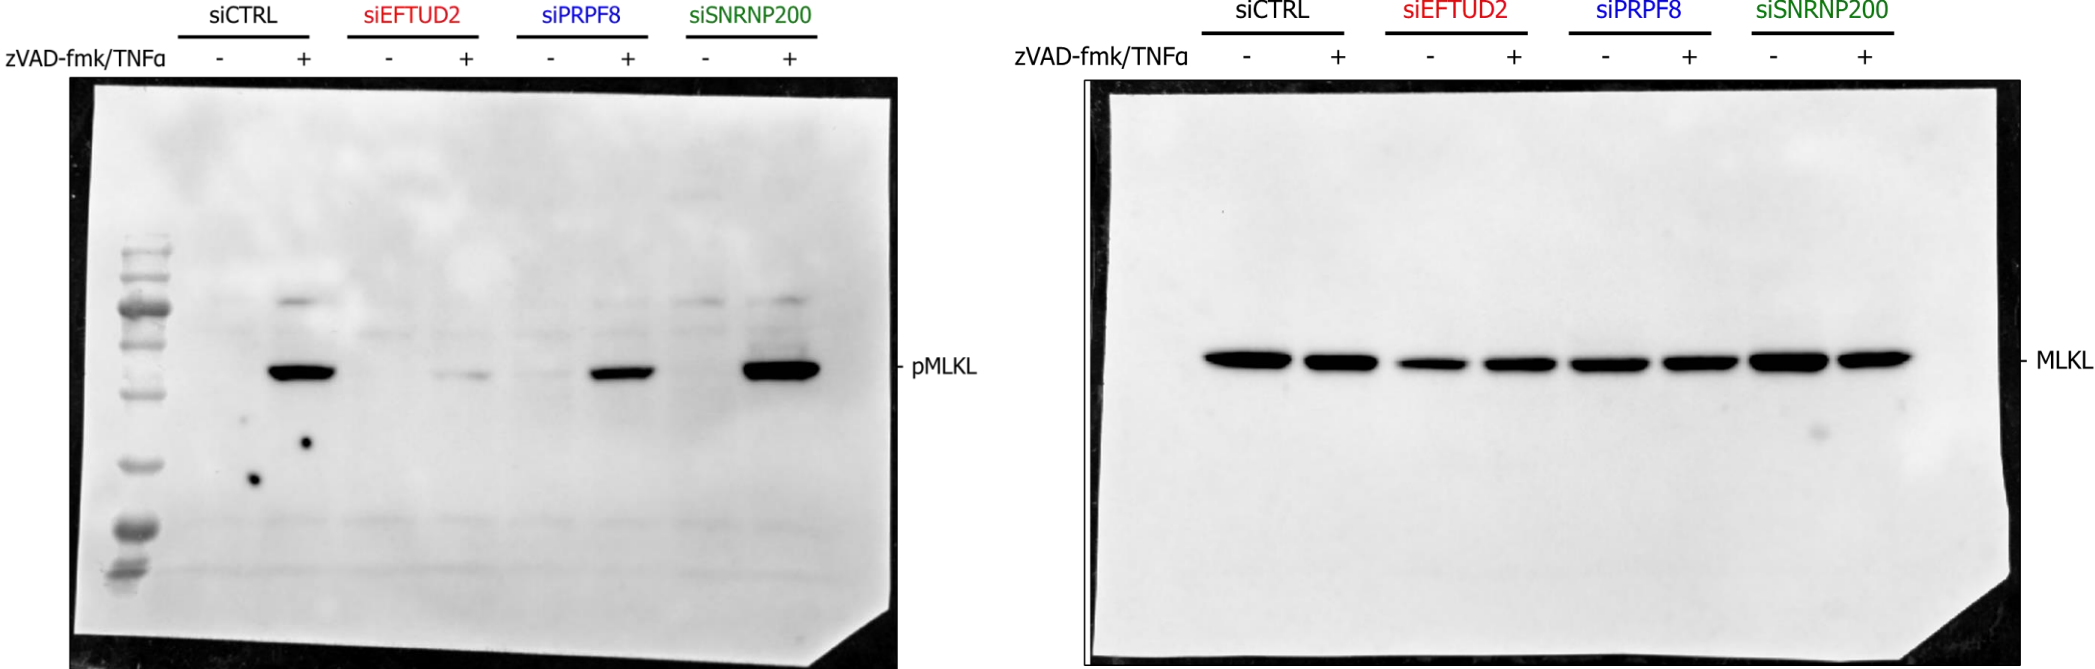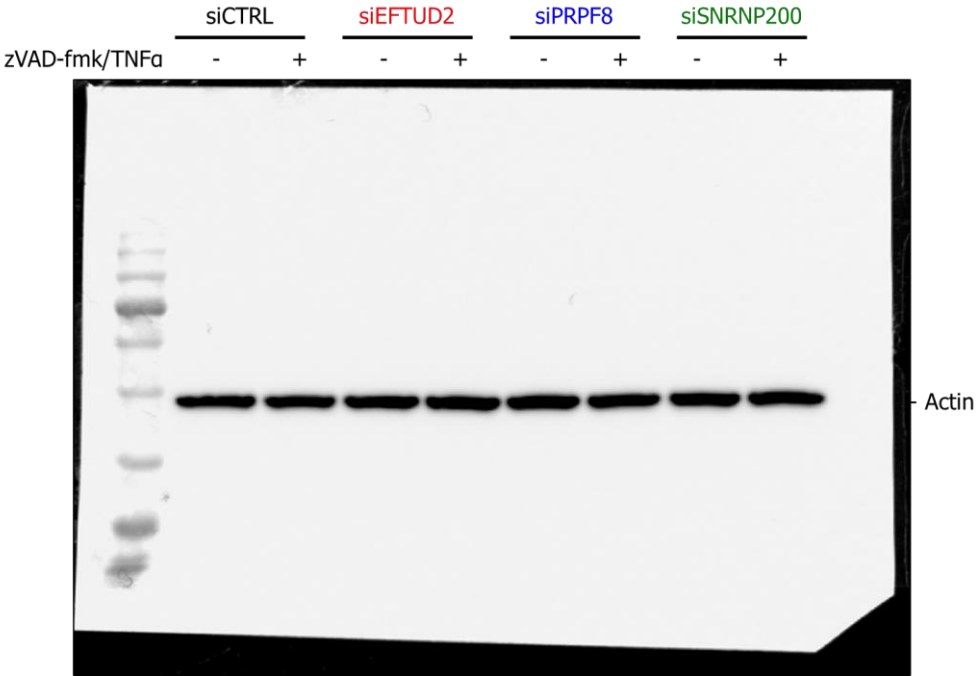

Figure S11 (cont'd)

Figure 4B

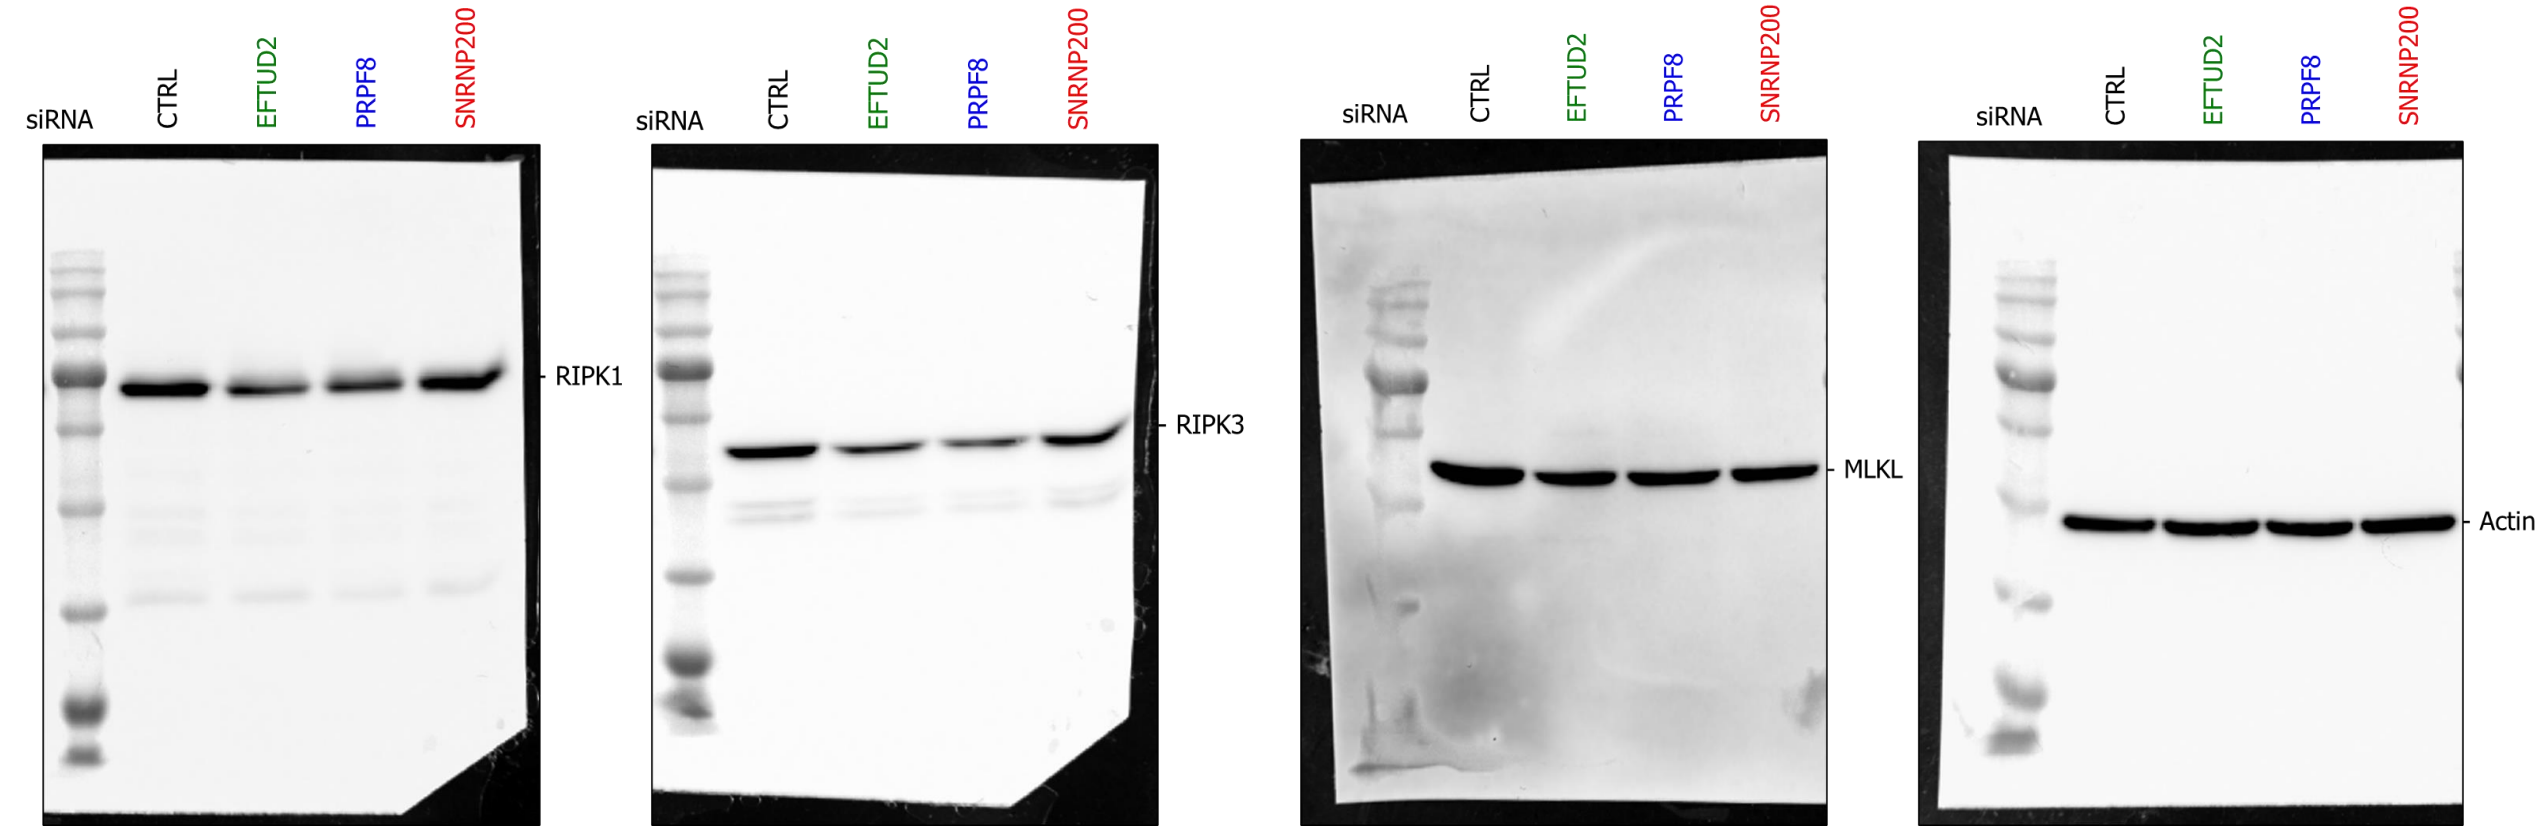

Figure S11 (cont'd)
